# Supplementary material
Source: PubMed Central journal article supplement (PMC4167764)
Supplement: NIHMS507797-supplement-1_si_001.pdf [file NIHMS507797-supplement-1_si_001.pdf]

**Supporting Information**  
**for**  
**Formation of nitro-PAHs from the heterogeneous reaction of ambient particle-bound**  
**PAHs with N<sub>2</sub>O<sub>5</sub>/NO<sub>3</sub>/NO<sub>2</sub>**

Kathryn Zimmermann, Roger Atkinson and Janet Arey\*

Air Pollution Research Center, University of California  
Riverside, California 92521, USA

and

Narumol Jariyasopit and Staci L. Massey Simonich  
Department of Chemistry, Oregon State University  
Corvallis, Oregon 97331, USA

and

Shu Tao

College of Urban and Environmental Science, Peking University  
Beijing, 100871, China

\* Author to whom correspondence should be addressed. J. Arey:  
telephone: +1-951-827-3502; email: janet.arey@ucr.edu

**Pages: 55**  
**Figures: 12**  
**Tables: 9**

## Experimental Methods

### Ambient Filter Sample Collection

*Los Angeles Basin.* Noted on Figure S1 are Los Angeles, Azusa, Riverside, and Banning, CA, four sites in the Los Angeles Air Basin where ambient filter samples were collected during a photochemical air pollution episode on August 22-23, 1997 as part of the Southern California Ozone Study-North American Research Strategy for Tropospheric Ozone (SCOS97-NARSTO) campaign. Samples were collected at an average flow rate of  $\sim 0.6 \text{ m}^3 \text{ min}^{-1}$  at time intervals of 0600-1200, 1200-1800, and 1800-0600 hr for Los Angeles and Azusa samples, and 0600-1800 and 1800-0600 hr for the Riverside and Banning sites. Filter samples were collected using high-volume (Hi-vol) sampling devices, each consisting of a Teflon-impregnated glass fiber (TIGF) filter (Pallflex T60A20, 8 in  $\times$  10 in) for collection of ambient particulate matter (PM) located upstream of two polyurethane foam (PUF) plugs in series for the collection of semi-volatile compounds. Filters were then stored at  $-20^\circ\text{C}$  until extraction and analysis in 2012. Volatile species, such as naphthalene, 1- and 2-methylnaphthalene, and biphenyl were sampled onto Tenax TA absorptive cartridges as previously described (Atkinson et al., 2001). Volatile PAHs collected on Tenax were analyzed in 1997 as soon as possible after sampling and are reported in Atkinson et al., 2001. Polyurethane foam (PUF) plugs collected during the same study were Soxhlet extracted with DCM, fractionated with high performance liquid chromatography (HPLC), and the nitro-PAH fraction (Fr. 4) analyzed by GC-MS as previously described (Atkinson et al., 2001). These PUF plug extracts were archived at  $-20^\circ\text{C}$  until re-analysis of the nitro-PAH fraction for this study. Concentrations of semi-volatile nitro-PAHs collected on PUF plugs and reported (Atkinson et al., 2001), match well with the concentrations derived from re-analysis in 2012.

*Riverside 2012:* Particulate matter was collected on TIGF filters (Pallflex T60A20, 8 in × 10 in) at an average flow rate of  $\sim 0.6 \text{ m}^3 \text{ min}^{-1}$  for 12-hour intervals concurrently with two Hi-vol sampling apparatus located at the Air Pollution Research Center at the University of California, Riverside.

*Beijing.* Samples of particles with diameters  $< 10 \text{ }\mu\text{m}$  were collected at Peking University in Beijing, China from May 2009 to February 2010 and  $< 2.5 \text{ }\mu\text{m}$  from April 20-22, 2011 using a three-stage High Volume Cascade Impactor (Series 230, Tisch Environmental, Cleves, OH) equipped with quartz filters (no. 1851-865, Tisch Environmental, Cleves, OH; 8 in × 10 in) during 24-hour collection intervals at a flow rate of  $\sim 1.0 \text{ m}^3 \text{ min}^{-1}$  (Wang et al., 2009). Samples were stored frozen until shipment to the United States and then stored at  $-20 \text{ }^\circ\text{C}$  until this study.

Table S1 gives a summary of the details of the sample collection for all the ambient filters used in chamber studies.

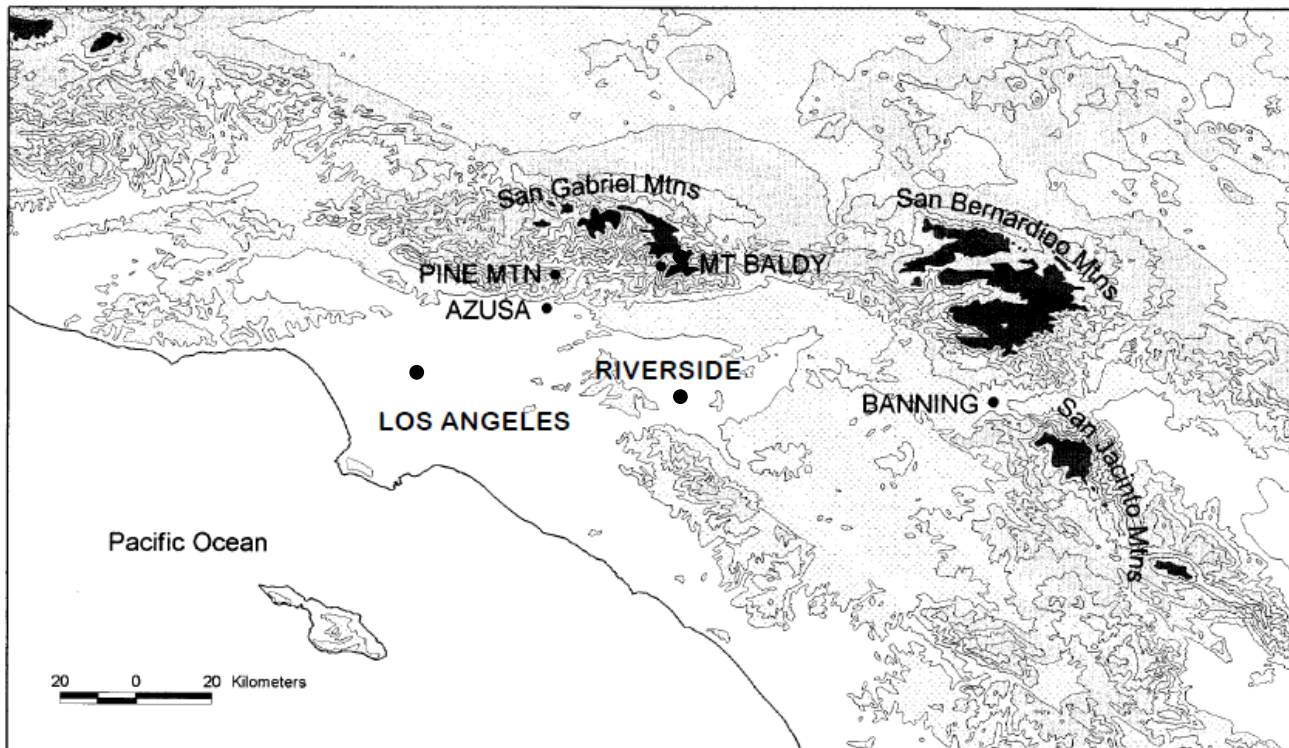

Figure S1. Map showing the four sites from the Southern California Ozone Study-North American Research Strategy for Tropospheric Ozone (SCOS97-NARSTO) campaign from which archived particulate matter (PM) filters were employed in this study. The sites were: Los Angeles, Azusa, Riverside, and Banning, CA. Half of each PM filter was analyzed for selected PAH and nitro-PAH and the remaining half was exposed to  $N_2O_5/NO_3/NO_2$  in an environmental chamber prior to analysis.

Table S1. Sampling details for ambient samples used in chamber studies

| Sample identification  | Location                         | Date              | Time      | Total sample volume (m <sup>3</sup> ) <sup>a</sup> | Size selective inlet |
|------------------------|----------------------------------|-------------------|-----------|----------------------------------------------------|----------------------|
| Beijing 1 <sup>b</sup> | Peking University <sup>c</sup>   | May 2009-Feb 2010 | 24-hr.    | 1336                                               | <10 μm               |
| Beijing 2 <sup>b</sup> | Peking University <sup>c</sup>   | 4/20/11-4/21/11   | 24-hr.    | 1401                                               | <2.5 μm              |
| Beijing 3 <sup>b</sup> | Peking University <sup>c</sup>   | 4/21/11-4/22/11   | 24-hr.    | 1353                                               | <2.5 μm              |
| LA97-1                 | Central Los Angeles <sup>d</sup> | 8/22/97           | 0600-1158 | 200                                                | None                 |
| LA97-2                 | Central Los Angeles <sup>d</sup> | 8/22/97           | 1202-1800 | 200                                                | None                 |
| LA97-3                 | Central Los Angeles <sup>d</sup> | 8/22/97-8/23/97   | 1803-0556 | 400                                                | None                 |
| LA97-4                 | Central Los Angeles <sup>d</sup> | 8/23/97           | 0602-1158 | 200                                                | None                 |
| LA97-5                 | Central Los Angeles <sup>d</sup> | 8/23/97           | 1202-1800 | 200                                                | None                 |
| A97-13                 | Azusa <sup>e</sup>               | 8/22/97           | 0600-1200 | 200                                                | None                 |
| A97-15                 | Azusa <sup>e</sup>               | 8/22/97           | 1203-1800 | 200                                                | None                 |
| A97-16                 | Azusa <sup>e</sup>               | 8/22/97-8/23/97   | 1800-0600 | 400                                                | None                 |
| A97-18                 | Azusa <sup>e</sup>               | 8/23/97           | 0603-1200 | 200                                                | None                 |
| A97-20                 | Azusa <sup>e</sup>               | 8/23/97           | 1204-1800 | 200                                                | None                 |
| R97-13                 | Riverside <sup>f</sup>           | 8/22/97           | 0600-1802 | 400                                                | None                 |
| R97-14                 | Riverside <sup>f</sup>           | 8/22/97-8/23/97   | 1811-0600 | 400                                                | None                 |
| R97-15                 | Riverside <sup>f</sup>           | 8/23/97           | 0614-1750 | 400                                                | None                 |
| B97-14                 | Banning <sup>g</sup>             | 8/22/97           | 0605-1800 | 400                                                | None                 |
| B97-15                 | Banning <sup>g</sup>             | 8/22/97-8/23/97   | 1814-0600 | 400                                                | None                 |
| B97-17                 | Banning <sup>g</sup>             | 8/23/97           | 0607-1800 | 400                                                | None                 |
| R2012 N1               | Riverside <sup>h</sup>           | 5/10/12-5/11/12   | 1800-0600 | 446 <sup>i</sup>                                   | None                 |
| R2012 D1               | Riverside <sup>h</sup>           | 5/11/12           | 0600-1800 | 446 <sup>i</sup>                                   | None                 |
| R2012 N2               | Riverside <sup>h</sup>           | 5/11/12-5/12/12   | 1800-0600 | 446 <sup>i</sup>                                   | None                 |

| Sample identification | Location               | Date            | Time      | Total sample volume (m <sup>3</sup> ) <sup>a</sup> | Size selective inlet |
|-----------------------|------------------------|-----------------|-----------|----------------------------------------------------|----------------------|
| R2012 D2              | Riverside <sup>h</sup> | 5/12/12         | 0600-1800 | 446 <sup>i</sup>                                   | None                 |
| R2012 N3              | Riverside <sup>h</sup> | 5/12/12-5/13/12 | 1800-0600 | 446 <sup>i</sup>                                   | None                 |
| R2012 D3              | Riverside <sup>h</sup> | 5/13/12         | 0600-1800 | 446 <sup>i</sup>                                   | None                 |
| R2012 N4              | Riverside <sup>h</sup> | 5/13/12-5/14/12 | 1800-0600 | 446 <sup>i</sup>                                   | None                 |
| R2012 D4              | Riverside <sup>h</sup> | 5/14/12         | 0600-1800 | 446 <sup>i</sup>                                   | None                 |
| R97 MS                | Riverside <sup>f</sup> | 10/4/97         | 0555-1740 | 3200 <sup>j</sup>                                  | <20 $\mu$ m          |

<sup>a</sup>Total volume sampled using a high-volume (Hi-vol) sampling apparatus, unless noted otherwise.

<sup>b</sup>Each Hi-vol filter from Beijing, China was divided into six equal portions, allowing for three replicate exposed and unexposed measurements per filter sample.

<sup>c</sup>Sampling site located on the roof of the 7-story Geology Building, about 25 m above ground level.

<sup>d</sup>North Main Street monitoring station.

<sup>e</sup>Air Quality Management District monitoring station.

<sup>f</sup>University of California, Riverside Agricultural Operations Area.

<sup>g</sup>Banning Airport.

<sup>h</sup>University of California, Air Pollution Research Center.

<sup>i</sup>Reported volume represents the average volume sampled by two Hi-vols sampling simultaneously.

<sup>j</sup>Sampled using an ultra-high volume particulate sampler (Mega-sampler) containing four TIGF filters (each 16 in  $\times$  20 in).

## Environmental Chamber Exposures

*Ambient Particulate Matter and PAH-d<sub>x</sub> Coated Filters.* Experiments were performed at ~296 K and ~735 Torr of dry purified air in a ~7 m<sup>3</sup> collapsible Teflon chamber equipped with a Teflon-coated fan. The ambient filters were divided into equal portions to provide an unexposed control for each exposed filter portion, thus allowing the initial particle-bound PAH and nitro-PAH concentrations to be compared with those following exposure to N<sub>2</sub>O<sub>5</sub>/NO<sub>3</sub>/NO<sub>2</sub> in the chamber (Figure S2). NO<sub>3</sub> radicals were generated in the dark from the thermal decomposition of N<sub>2</sub>O<sub>5</sub> in the presence of NO<sub>2</sub>. Initial concentrations of N<sub>2</sub>O<sub>5</sub> and NO<sub>2</sub> (flushed into the chamber using N<sub>2</sub>) were 0.42 - 0.48 ppmv and ~1 ppmv, respectively (1 ppmv = 2.4 × 10<sup>13</sup> molecule cm<sup>-3</sup> at 296 K and 735 Torr total pressure). The chamber was continually flushed at 100 L min<sup>-1</sup> to avoid build-up of NO<sub>2</sub>, resulting in a residence time of ~70 min for gaseous species in the chamber. N<sub>2</sub>O<sub>5</sub> and NO<sub>2</sub> were introduced into the chamber at the above concentrations a total of 8 times (addition of N<sub>2</sub>O<sub>5</sub> and NO<sub>2</sub> once per hour) during each experiment. Table S2 gives details of individual experiments, including experiments in which PAH-d<sub>x</sub> coated filters were co-exposed with the ambient filters.

*Deuterated PAH-Coated Filter Exposures.* Mixtures of PY-d<sub>10</sub>, FL-d<sub>10</sub>, and TP-d<sub>12</sub> in methanol were deposited onto clean TIGF filters (Pallflex T60A20, 8 in × 10 in), which were then dried in a clean atmosphere for ~30 min. In addition, separate filters coated with solutions of BaA-d<sub>12</sub>, CHR-d<sub>12</sub>, or BaP-d<sub>12</sub> were exposed in two experiments. NO<sub>3</sub> radicals were generated as described above, with initial concentrations of N<sub>2</sub>O<sub>5</sub> and NO<sub>2</sub>: 0.21-0.48 ppmv and 0.5-1.0 ppmv, respectively. The number of additions of N<sub>2</sub>O<sub>5</sub> and NO<sub>2</sub> varied among individual experiments with a maximum number of 8 additions during a single experiment (Table S2). After exposure, filters were removed from the chamber and stored at -20° C until further

analysis. Several filters, coated and dried as described above, were stored unreacted at  $-20\text{ }^{\circ}\text{C}$  until analysis for observation of loss of deuterated PAHs during the deposition and drying processes. A polyurethane foam (PUF) plug was inserted into the chamber outflow vent for several experiments to allow monitoring of gas-phase deuterated PAHs and nitro-PAHs in the chamber.

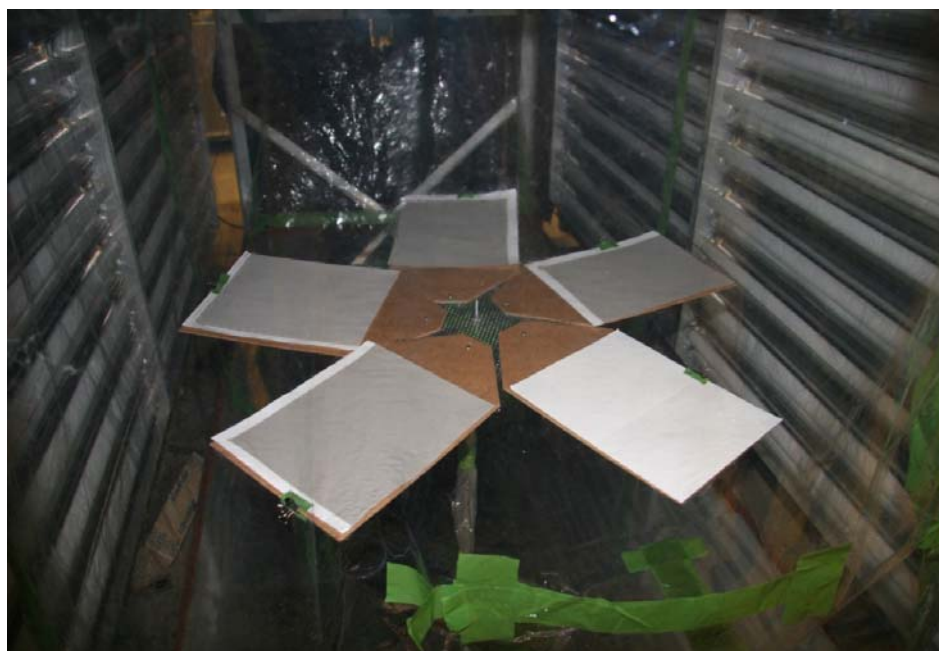

Figure S2. Apparatus used for exposing filters to  $\text{N}_2\text{O}_5/\text{NO}_3/\text{NO}_2$ . Shown is a filter coated with deuterated PAH (that at the 5 o'clock position) and four filters on which ambient particles were collected.



Table S2. Experimental details for chamber exposures of ambient filter samples and filters with adsorbed deuterated PAH

| Experiment No. | Date     | Ambient filters        | Deuterated filters                                                                                                                  | PUF in outflow <sup>a</sup> | N <sub>2</sub> O <sub>5</sub> /NO <sub>2</sub> additions <sup>b</sup> | Avg. N <sub>2</sub> O <sub>5</sub> per addition <sup>c</sup> | Avg. NO <sub>2</sub> per addition <sup>c</sup> |
|----------------|----------|------------------------|-------------------------------------------------------------------------------------------------------------------------------------|-----------------------------|-----------------------------------------------------------------------|--------------------------------------------------------------|------------------------------------------------|
| 2418           | 01/17/11 | Beijing 1 <sup>d</sup> | None                                                                                                                                | N                           | 8                                                                     | 0.48 ppmv                                                    | 1.0 ppmv                                       |
| 2419           | 01/20/11 |                        | FL-d <sub>10</sub> /PY-d <sub>10</sub> /<br>TP-d <sub>12</sub>                                                                      | Y                           | 2                                                                     | 0.47 ppmv                                                    | 1.0 ppmv                                       |
| 2420           | 01/20/11 |                        | FL-d <sub>10</sub> /PY-d <sub>10</sub> /<br>TP-d <sub>12</sub>                                                                      | Y                           | 2                                                                     | 0.46 ppmv                                                    | 1.0 ppmv                                       |
| 2421           | 01/21/11 |                        | FL-d <sub>10</sub> /PY-d <sub>10</sub> /<br>TP-d <sub>12</sub>                                                                      | Y                           | 2                                                                     | 0.45 ppmv                                                    | 1.0 ppmv                                       |
| 2422           | 01/21/11 |                        | FL-d <sub>10</sub> /PY-d <sub>10</sub> /<br>TP-d <sub>12</sub>                                                                      | Y                           | 2                                                                     | 0.47 ppmv                                                    | 1.0 ppmv                                       |
| 2506           | 10/17/11 |                        | FL-d <sub>10</sub> /PY-d <sub>10</sub> /<br>TP-d <sub>12</sub> , BaA-d <sub>12</sub> ,<br>CHR-d <sub>12</sub> , BaP-d <sub>12</sub> | Y                           | 2                                                                     | 0.45 ppmv                                                    | 1.0 ppmv                                       |
| 2507           | 10/18/11 |                        | FL-d <sub>10</sub> /PY-d <sub>10</sub> /<br>TP-d <sub>12</sub>                                                                      | Y                           | 8                                                                     | 0.45 ppmv                                                    | 1.0 ppmv                                       |
| 2508           | 10/19/11 |                        | FL-d <sub>10</sub> /PY-d <sub>10</sub> /<br>TP-d <sub>12</sub> , BaA-d <sub>12</sub> ,<br>CHR-d <sub>12</sub> , BaP-d <sub>12</sub> | N                           | 1                                                                     | 0.21 ppmv                                                    | 0.5 ppmv                                       |

| Experiment No. | Date     | Ambient filters                                                              | Deuterated filters                                         | PUF in outflow <sup>b</sup> | N <sub>2</sub> O <sub>5</sub> /NO <sub>2</sub> additions <sup>b</sup> | Ave. N <sub>2</sub> O <sub>5</sub> per addition <sup>c</sup> | Ave. NO <sub>2</sub> per addition <sup>c</sup> |
|----------------|----------|------------------------------------------------------------------------------|------------------------------------------------------------|-----------------------------|-----------------------------------------------------------------------|--------------------------------------------------------------|------------------------------------------------|
| 2509           | 10/20/11 | Los Angeles 1997, Azusa 1997                                                 | None                                                       | Y                           | 8                                                                     | 0.42 ppmv                                                    | 1.0 ppmv                                       |
| 2511           | 10/25/11 | Beijing 2 <sup>d</sup> , Beijing 3 <sup>d</sup> , Riverside Megasampler 1997 | None                                                       | N                           | 8                                                                     | 0.42 ppmv                                                    | 1.0 ppmv                                       |
| 2522           | 01/12/12 | Riverside 1997, Banning 1997                                                 | FL-d <sub>10</sub> /PY-d <sub>10</sub> /TP-d <sub>12</sub> | N                           | 8                                                                     | 0.45 ppmv                                                    | 1.0 ppmv                                       |
| 2529           | 05/15/12 | Riverside 2012                                                               | FL-d <sub>10</sub> /PY-d <sub>10</sub> /TP-d <sub>12</sub> | Y                           | 8                                                                     | 0.46 ppmv                                                    | 1.0 ppmv                                       |
| 2530           | 05/16/12 | Riverside 2012                                                               | FL-d <sub>10</sub> /PY-d <sub>10</sub> /TP-d <sub>12</sub> | Y                           | 8                                                                     | 0.45 ppmv                                                    | 1.0 ppmv                                       |

<sup>a</sup>Y = PUF plug present; N = PUF plug not present.

<sup>b</sup>Additions of N<sub>2</sub>O<sub>5</sub> and NO<sub>2</sub> were performed approximately once every hour for experiments consisting of more than one addition, with the 1, 2, and 8 addition experiments corresponding to 0.25, 2.5, and 8 hr of exposure, respectively, of filters in the chamber.

<sup>c</sup>As noted in the section **NO<sub>3</sub>/N<sub>2</sub>O<sub>5</sub> Concentrations in Chamber Studies** (page S14), the estimated average NO<sub>3</sub> radical concentration was ~600 pptv ( $\sim 1.4 \times 10^{10}$  molecule cm<sup>-3</sup>). Under our experimental conditions, 1 ppmv =  $2.4 \times 10^{13}$  molecule cm<sup>-3</sup>.

<sup>d</sup>One filter was divided in six equal portions, providing 3 exposed replicates and 3 unexposed replicates.

## Analytical Methods

*Deuterated Filters.* Each filter coated with deuterated PAHs (unexposed and exposed) was spiked with internal standards and Soxhlet extracted in dichloromethane (DCM). Extracts were then eluted through Si SPE columns with DCM and concentrated. All deuterated filter extracts were analyzed using GC-MS with EI ionization and selected ion monitoring (SIM) for both PAHs and nitro-PAHs.

*Deuterated NPAHs.* Each filter coated with deuterated PAHs (unexposed and exposed) was spiked with an internal standard of PY, TP, 1-NPY, and 2-NTP and Soxhlet extracted in DCM. Extracts were then eluted through Si SPE columns (Supelco Discovery DSC-Si, 6 mL, 1 g; conditioned with 20 mL DCM) with 40 mL DCM and concentrated. All deuterated filter extracts were analyzed with GC-MS (5973N MSD) with EI ionization and SIM for both PAHs and nitro-PAHs. Deuterated PAHs were quantified based on their molecular  $[M]^+$  ion with an assumed 100% response and deuterated nitro-PAHs were quantified by summing the  $[M]^+$ ,  $[M-NO]^+$ ,  $[M-NO_2]^+$ ,  $[M-HNO_2]^+$  and  $[M-CO-NO]^+$  ions, typically used to identify nitro-PAHs (Pitts et al., 1985a). Deuterated dinitrofluoranthenes (DNFLs) and dinitropyrenes (DNPYs) were tentatively identified by matching the retention times of 1,2-DNFL, 1,3-, 1,6-, and 1,8-DNPY, combined with reported retention indices of DNFLs (Ramdahl et al., 1986), and fragmentation patterns in EI mode (Ramdahl et al., 1988).

*PUF Plug Analysis.* Each PUF plug from the chamber outflow was Soxhlet extracted with DCM and eluted through a Si SPE column as described above. Extracts were then analyzed with GC-MS using NCI and EI ionization for nitro-PAHs and positive chemical ionization (PCI) and EI ionization for PAHs. Compound identifications were confirmed by retention times of

authentic standards and deuterated nitro-PAH identifications were confirmed by observed EI fragmentation patterns.

*SCOS97 and Riverside 2012.* For each experiment, both unexposed and exposed ambient filter samples were spiked with an internal standard (PY-d<sub>10</sub>, TP-d<sub>12</sub>, and 1-NPY-d<sub>9</sub>) and Soxhlet extracted separately with dichloromethane (DCM). Extracts were then concentrated and eluted through a silica (Si) solid-phase extraction column (SPE) (Supelco Discovery DSC-Si, 6 mL, 1 g, conditioned with 20 mL DCM) with 40 mL DCM. For Riverside filters sampled on May 10-14, 2012, the unexposed and exposed extracts consisted of composited filters from two co-located, simultaneously sampling, Hi-vol samplers. Ambient extracts were analyzed for PAHs with gas-chromatography mass-spectrometry (GC-MS, Agilent Technologies, 5973N MSD) with electron impact (EI) ionization in SIM mode, equipped with a 60 m DB-17 column (50% phenyl-substituted methylpolysiloxane, 0.25 mm inner diameter, 0.25 µm phase thickness, J&W Scientific, Inc). Ambient nitro-PAHs were identified with GC-MS (5975 MSD) using negative chemical ionization (NCI) with CH<sub>4</sub> as the reagent gas and a 60 m DB-17 column. Compound identifications were confirmed by retention times of authentic standards and quantities calculated based on NCI response factors of available authentic standards.

*Beijing PM.* Using the extraction method described previously (Wang et al., 2011), extracts from Beijing were analyzed for PAH and nitro-PAHs after spiking with perdeuterated PAH and nitro-PAH surrogates and then eluted through 20 g silica columns (Mega BE-SI, Agilent Technologies, New Castle, DE) with DCM. PAH analysis was performed using GC-MS (Agilent 6890 GC coupled with an Agilent 5973N MSD) in SIM mode using EI ionization. Nitro-PAHs were analyzed using GC-MS/NCI (using CH<sub>4</sub> as the reagent gas) with a programmed temperature vaporization (PTV) inlet (Gerstel, Germany), and both a DB-5MS (30

m × 0.25 mm I.D., 0.25 μm film thickness, J & W Scientific) and a DB-17MS (30 m × 0.25 mm I.D., 0.25 μm film thickness, J & W Scientific) as previously reported (Wang et al., 2011).

### **Chemicals**

The chemicals used, along with their stated purities, were as follows: pyrene-d<sub>10</sub> (98%), Cambridge Isotope Laboratories; fluoranthene-d<sub>10</sub> (99.2%), MSD Isotopes; benz[a]anthracene-d<sub>12</sub> (98%), KOR Isotopes; chrysene-d<sub>12</sub> (99.7%), triphenylene-d<sub>12</sub> (98.4%), benzo[a]pyrene-d<sub>12</sub> (99.6%), benzo[b]fluoranthene-d<sub>12</sub> (98.7%), 6-nitrochrysene-d<sub>11</sub> (99.7%), CDN Isotopes; benzo[ghi]perylene-d<sub>12</sub> (98%), Cambridge Isotope Laboratories; pyrene (≥99%), triphenylene (98%), Aldrich; 1-nitrotriphenylene, and 2-nitrotriphenylene, Hayashi Pure Chemicals. 1-nitropyrene-d<sub>9</sub> had been previously synthesized using N<sub>2</sub>O<sub>5</sub> in CCl<sub>4</sub> solution (Zielinska et al., 1986). N<sub>2</sub>O<sub>5</sub> was prepared and stored as previously described (Atkinson et al., 1990). NO<sub>2</sub> was prepared as needed by reacting NO with an excess of O<sub>2</sub>. The NIST standard SRMs 1647c, 2265, and 1596 were used to identify PAHs, nitro-PAHs, and dinitro-PAHs and, for the nitro-PAHs, to calculate response factors for certain isomers. Methanol and dichloromethane (Optima grade), Fisher.

## NO<sub>3</sub> Radical

### NO<sub>3</sub>/N<sub>2</sub>O<sub>5</sub> Concentrations in Chamber Studies

The experiments were designed to mimic the possible exposure of PM to NO<sub>3</sub> radicals occurring during seven days of transport. Since NO<sub>3</sub> photolyzes rapidly (IUPAC, 2013), ambient exposures to NO<sub>3</sub> would occur during the night. For

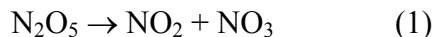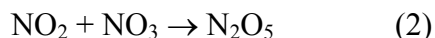

then at the high pressure limit and 298K,

$$\begin{aligned} [\text{NO}_3] &= k_1[\text{N}_2\text{O}_5]/k_2[\text{NO}_2] = 0.069[\text{N}_2\text{O}_5]/1.9 \times 10^{-12}[\text{NO}_2] \\ &= 3.63 \times 10^{10} [\text{N}_2\text{O}_5]/[\text{NO}_2] \text{ with concentrations in molecule cm}^{-3} \end{aligned}$$

with  $k_1$  and  $k_2$  being rate constants for reactions 1 and 2, respectively, and concentrations in molecule cm<sup>-3</sup> (IUPAC, 2013).

For ambient PM exposure experiments, the 8 additions of 1 ppm NO<sub>2</sub> and 0.41-0.48 ppm N<sub>2</sub>O<sub>5</sub>, correspond to a total exposure of ~600 ppt of NO<sub>3</sub> for 9.75 hr. Since the concentrations would decrease with time between additions (every hour) due to wall loss and flush-out and the wall loss rate of N<sub>2</sub>O<sub>5</sub> in a Teflon chamber in dry air has been measured to be ~0.3 hr<sup>-1</sup> (Tuazon et al., 1983, Atkinson et al., 1986), the average NO<sub>3</sub> could be ~67% of the initial concentration, i.e., ~400 ppt. This is equivalent to 45 ppt (1 × 10<sup>9</sup> molecule cm<sup>-3</sup>) for 12-hr nighttime periods for 7 days.

In the present study, the [N<sub>2</sub>O<sub>5</sub>]/[NO<sub>3</sub>] ratios in the chamber experiments were ~600, thus greatly exceeding the corresponding ratios in the ambient atmospheres. Therefore due to the high NO<sub>2</sub> concentrations employed, our chamber exposures had high potentials for heterogeneous N<sub>2</sub>O<sub>5</sub> reactions. The concentrations of NO<sub>2</sub> (~1 ppmv) and N<sub>2</sub>O<sub>5</sub> (~0.5 ppmv) are

factors of  $\geq 100$  higher than observed in ambient atmospheres (Heintz et al., 1996; Stutz et al., 2004; Marley et al., 2007; Parrish et al., 2011). Thus, while the ambient PM was exposed to an  $\text{NO}_3$  concentration reasonably appropriate for a week-long transport event, the  $\text{NO}_2$  and  $\text{N}_2\text{O}_5$  concentrations far exceed, by at least two orders of magnitude, those expected in ambient for the same time period.

### **$\text{NO}_3/\text{N}_2\text{O}_5$ Formation in Ambient Air**

The nitrate radical is formed by the reaction of  $\text{NO}_2$  with  $\text{O}_3$ .

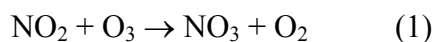

$$k_1(298\text{K}) = 3.5 \times 10^{-17} \text{ cm}^3 \text{ molecule}^{-1} \text{ s}^{-1} \text{ (IUPAC, 2013)}$$

$\text{NO}_3$  radicals photolyze rapidly (IUPAC, 2013) and therefore have generally been measured at significant concentrations only approaching or after sunset. Additionally, while the  $\text{NO}_3$  radical photolyzes during the day, often both its daytime and nighttime concentrations are limited by the reaction of  $\text{NO}_3$  with  $\text{NO}$

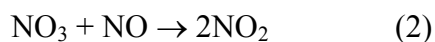

$$k_2(298\text{K}) = 2.6 \times 10^{-11} \text{ cm}^3 \text{ molecule}^{-1} \text{ s}^{-1} \text{ (IUPAC, 2013)}$$

At ground level,  $\text{NO}$  emitted from vehicles will react to remove  $\text{O}_3$  and, therefore, when traffic and  $\text{NO}$  levels are significant,  $\text{NO}_3$  radicals will not be present. It has recently been recognized, however, that an  $\text{NO}_3$  gradient increasing with elevation may occur (Stutz et al., 2004) and that significant  $\text{NO}_3$  may be present at higher altitudes (Reissell and Arey, 2001) even when none is present at ground level.

## Results

### Deuterated Nitro-PAH Formation

Filter-bound deuterated PAHs were exposed in the chamber to  $\text{N}_2\text{O}_5/\text{NO}_3/\text{NO}_2$  for various exposure times (Table S2). For comparison of relative reactivity, experiments MTC 2506 and 2508 were exposures of FL-d<sub>10</sub>, PY-d<sub>10</sub>, TP-d<sub>12</sub>, BaA-d<sub>12</sub>, CHR-d<sub>12</sub>, and BaP-d<sub>12</sub>. Filters containing only FL-d<sub>10</sub>, PY-d<sub>10</sub>, and TP-d<sub>12</sub> were exposed, along with ambient PM filters, to 8 additions of ~0.5 ppmv  $\text{N}_2\text{O}_5$  with 1 ppmv  $\text{NO}_2$ , over an 8 hr period (Table S2). After 8 additions of  $\text{N}_2\text{O}_5$ , the majority of the FL-d<sub>10</sub> and PY-d<sub>10</sub> had chemically reacted or volatilized from the filter surface and approximately 25% of TP-d<sub>12</sub> remained (Figure S3). A portion of each deuterated PAH was expected to volatilize during the process of drying each filter and during the extended reactions (thus accounting for the FL-d<sub>10</sub> and PY-d<sub>10</sub> observed on outflow PUF plugs). Based on control experiments, volatilization of FL-d<sub>10</sub> and PY-d<sub>10</sub> resulted in losses of 17-42% of the original deuterated PAH. Therefore, since total quantified PAH loss is calculated from the original amount of PAH-d<sub>x</sub> coated onto the filter and the final PAH-d<sub>x</sub> concentrations measured after exposure, the reported PAH-d<sub>x</sub> loss is the sum of chemical degradation and desorption from the surface of the filter.

The formation of nitro-PAH-d<sub>x</sub> during these reactions was measured to verify consistent experimental nitration conditions among different experiments exposing ambient PM. Figure S4 shows the increase in the amount of 1-, 3-, 7-, and 8-NFL-d<sub>9</sub>, 1-NPY-d<sub>9</sub>, and 1- and 2-NTP-d<sub>11</sub> formed with exposure to increasing amounts of  $\text{N}_2\text{O}_5$ . As seen in Figure S4, replicates of 2 and 8 additions (n=4) of  $\text{N}_2\text{O}_5$  and  $\text{NO}_2$  gave reproducible amounts of deuterated nitro-products (MTC 2506 used a newly synthesized batch of  $\text{N}_2\text{O}_5$  and is not included in Figure S4). The ratio of 1-NPY-d<sub>9</sub>/ΣNFLs-d<sub>9</sub> decreased progressively in going from 1 to 2 to 8 additions of  $\text{N}_2\text{O}_5$  and  $\text{NO}_2$ .



Under conditions of 1 addition of  $\text{N}_2\text{O}_5/\text{NO}_2$  over 0.25 hr, 1-NPY-d<sub>9</sub> is the dominant isomer observed, followed by  $\Sigma(1-, 3-, 7-, \text{ and } 8\text{-NFL-d}_9)$  and  $\Sigma(1\text{- and } 2\text{-NTP-d}_{11})$  and this order is consistent with the study reported by Zimmermann et al. (2012) during a 3 min “active” exposure of filter-adsorbed PY-d<sub>10</sub> FL-d<sub>10</sub>, and TP-d<sub>12</sub> to  $\text{N}_2\text{O}_5/\text{NO}_3/\text{NO}_2$  (i.e., the chamber contents were pulled through the filter coated with the deuterated PAH). After 2 additions of  $\text{N}_2\text{O}_5$ , concentrations of PY are already quite low (see Figure S3) and the secondary reaction of 1-NPY-d<sub>9</sub> to form dinitropyrenes (DNPYs) is believed to be responsible for the relative decrease in 1-NPY-d<sub>9</sub>/ $\Sigma$ NFLs-d<sub>9</sub> (see below).

The partial rate factors relative to nitrobenzene formation from nitration of benzene by  $\text{HNO}_3$  in acetic acid at 0°C have been measured for a number of nitro-PAHs. The reported values from nitration of BaP, PY, CHR, FL and TP are: 6-NBaP (108,000); 1-NPY (17,000); 6-NCHR (3,500); 3-NFL (1,363); 8-NFL (846); 1-NTP (600); 2-NTP (600); 7-NFL (546) and 1-NFL (329) (Ruehle et al., 1985). As previously observed when comparing  $\text{N}_2\text{O}_5$  nitrations of adsorbed PY and FL with those of filter adsorbed PAHs known to be more reactive toward solution-phase nitration (Pitts et al., 1985b), the more volatile PY and FL were more reactive than solution phase nitration would predict, perhaps suggesting that availability on the filter surface is important. Comparing nitration of the low volatility PAHs to one another (see Figure S5) the reactivity order that was observed is more similar to that in solution, namely, 7-NBaA-d<sub>11</sub> > 6-NBaP-d<sub>11</sub> > 6-NCHR-d<sub>11</sub> > 2NTP ~ 1NTP > 12-NBaA-d<sub>11</sub>.

Seven deuterated dinitropyrenes (DNPYs) and dinitrofluoranthenes (DNFLs) were identified on filters following 2 and 8 additions of  $\text{N}_2\text{O}_5$  (Figure S6), with 1,8-DNP-d<sub>8</sub> > 1,6-DNP-d<sub>8</sub> > 3,7-DNFL-d<sub>8</sub> > 1,3-DNPY-d<sub>8</sub> identified as major isomers observed. As expected, the amounts of deuterated DNPYs increased with increasing exposure to  $\text{N}_2\text{O}_5$ . These secondary

reactions and formation of deuterated dinitro-PAHs could affect isomer distributions observed from the 8 additions of  $N_2O_5$  over 8 hr. For example, because of the secondary formation of 1,8-, 1,6-, and 1,3-DNPY- $d_8$ , 1-NPY- $d_9$  was most likely originally formed in higher amounts than those measured at the end of the exposures.

The formation of 2-NFL by the reaction of FL with  $N_2O_5$  (Zielinska et al., 1986) or with  $N_2O_4$  (Squadrito et al., 1987; 1990) in  $CCl_4$  solution at room temperature is interpreted as occurring by formation of a radical  $\sigma$ -complex followed by multiple addition-elimination pathways (Squadrito et al., 1990). This interpretation is supported by the fact that even at low extents of nitration, these reactions also produce unusual dinitrofluoranthenes, with substitution occurring in the same ring. Thus in aprotic  $CCl_4$ ,  $N_2O_5$  is not ionized and the  $NO_3$ -FL complex (with attachment of the  $NO_3$  on position 3 of FL) adds  $NO_2$  and then eliminates  $HNO_3$  to form 2-NFL or adds another  $NO_3$  followed by addition of  $NO_2$  and loss of two  $HNO_3$  molecules to give 1,2-DNFL. 1,2-DNFL was shown to be absent on the exposed filter by use of an authentic standard of this isomer, and the DNFLs present were identified as having  $NO_2$  substitution on different rings, again suggesting that reaction of adsorbed FL was not an  $NO_3$  radical reaction.

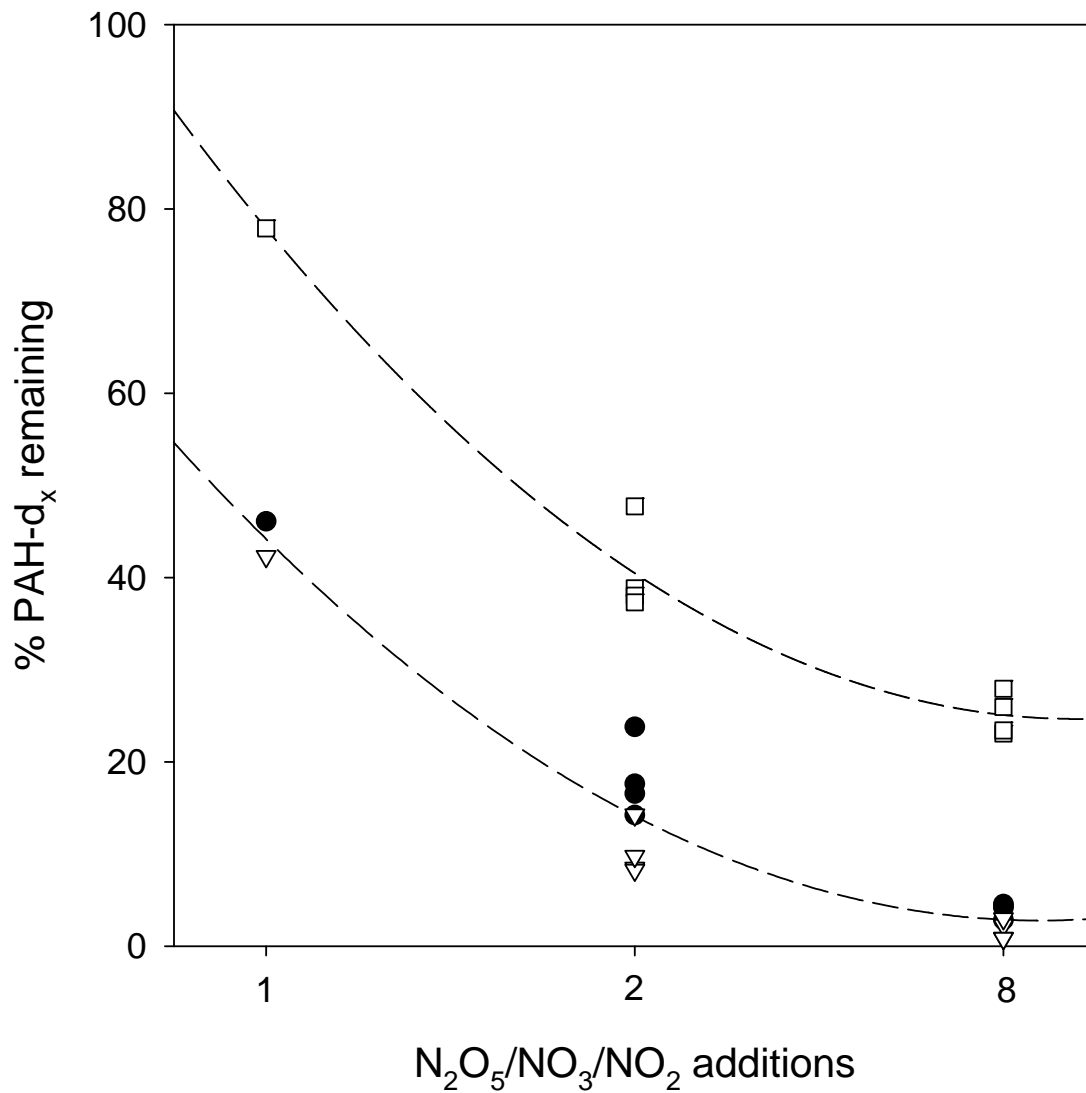

Figure S3. Decreases in deuterated FL-d<sub>10</sub> (●), PY-d<sub>10</sub> (▽), and TP-d<sub>12</sub> (□) after 1, 2, and 8 additions of N<sub>2</sub>O<sub>5</sub> and NO<sub>2</sub>. Additions were performed once per hour for each type of experiment. The observed losses are the sum of chemical degradation and volatilization from the surface of the filter. Dashed lines are for illustrative purposes only.

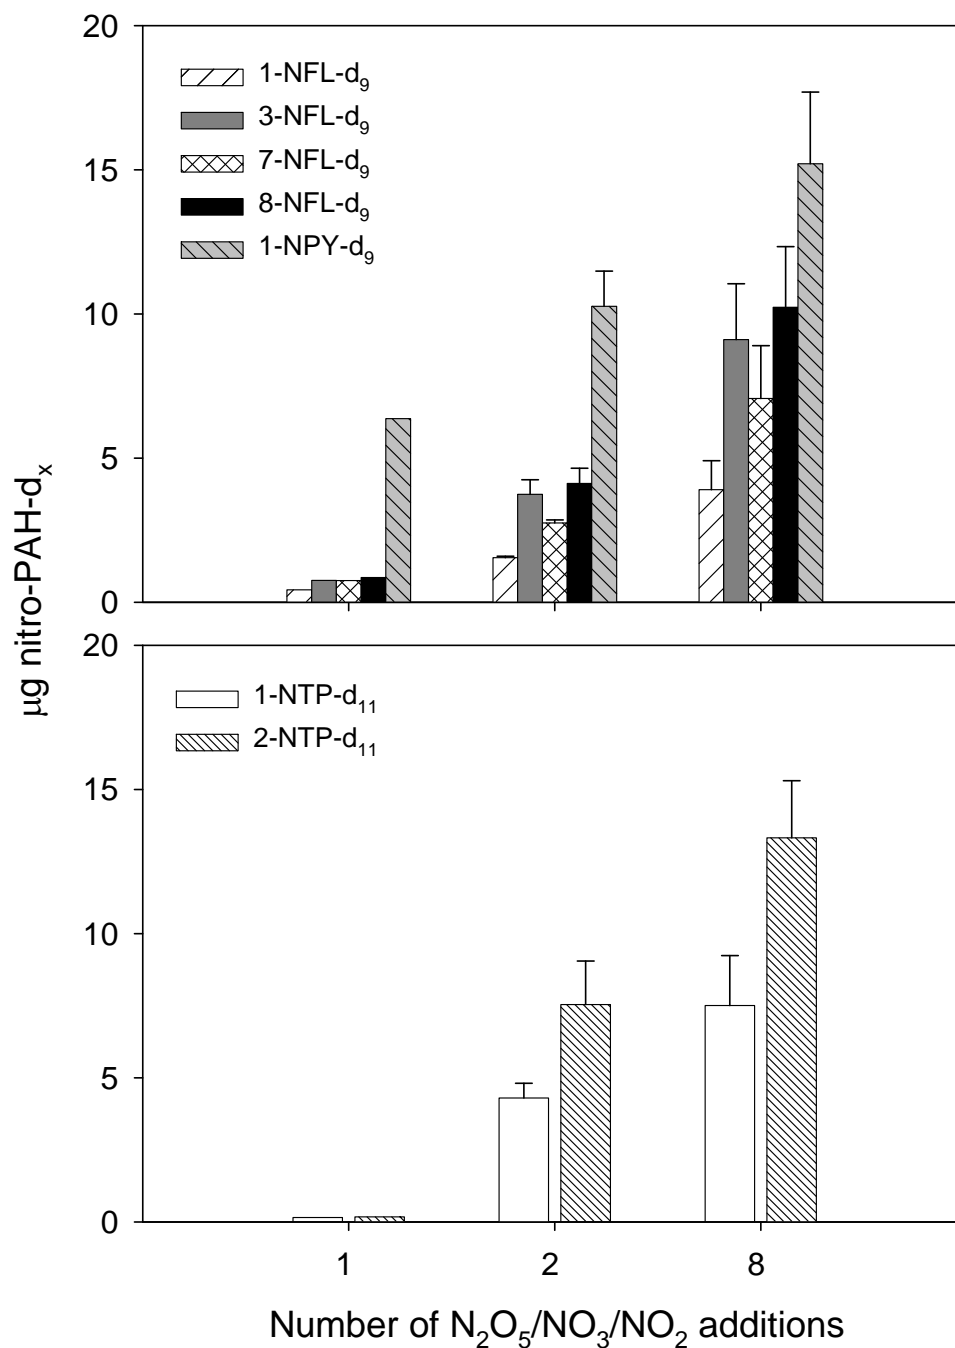

Figure S4. Deuterated NFLs, NPYs, and NTPs formed on the filters after 1, 2, and 8 additions of N<sub>2</sub>O<sub>5</sub> and NO<sub>2</sub>, with additions performed once an hour. Error bars for shown for the 2 and 8 additions represent one standard deviation from the mean of replicate experiments ( $n = 4$ ). No replicates were performed for the 1 addition of N<sub>2</sub>O<sub>5</sub> and NO<sub>2</sub>. Approximately 50 µg each of FL-d<sub>10</sub>, PY-d<sub>10</sub> and TP-d<sub>12</sub> were added to each filter in methanol solution and then dried.

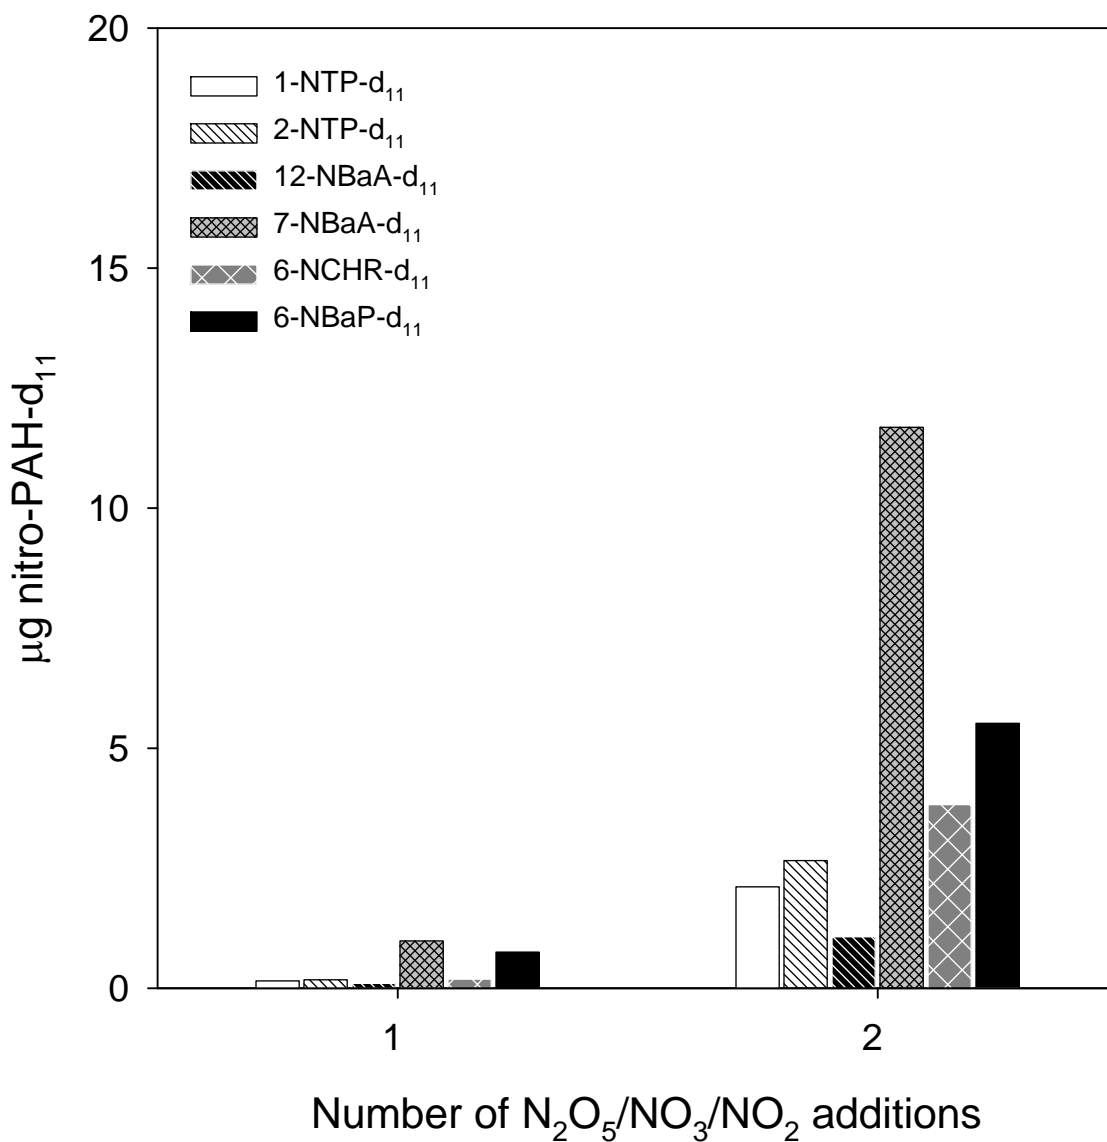

Figure S5. Deuterated NTPs, NBaAs, NCHR, and NBaP formed on the filters after 1 (MTC 2508) and 2 (MTC 2506) additions of  $N_2O_5$  with additions performed once an hour (each experiment was performed only once). The amount of each deuterated PAH applied in methanol solution to the filters was approximately 50  $\mu\text{g}$ . The amounts of 1-NPY-d<sub>9</sub> for the 1 and 2 additions shown here were 6.4 and 41.5  $\mu\text{g}$ , respectively. The amounts of  $\Sigma\text{NFLs-d}_9$  for the 1 and 2 additions shown here were 0.9 and 26.2  $\mu\text{g}$ , respectively.

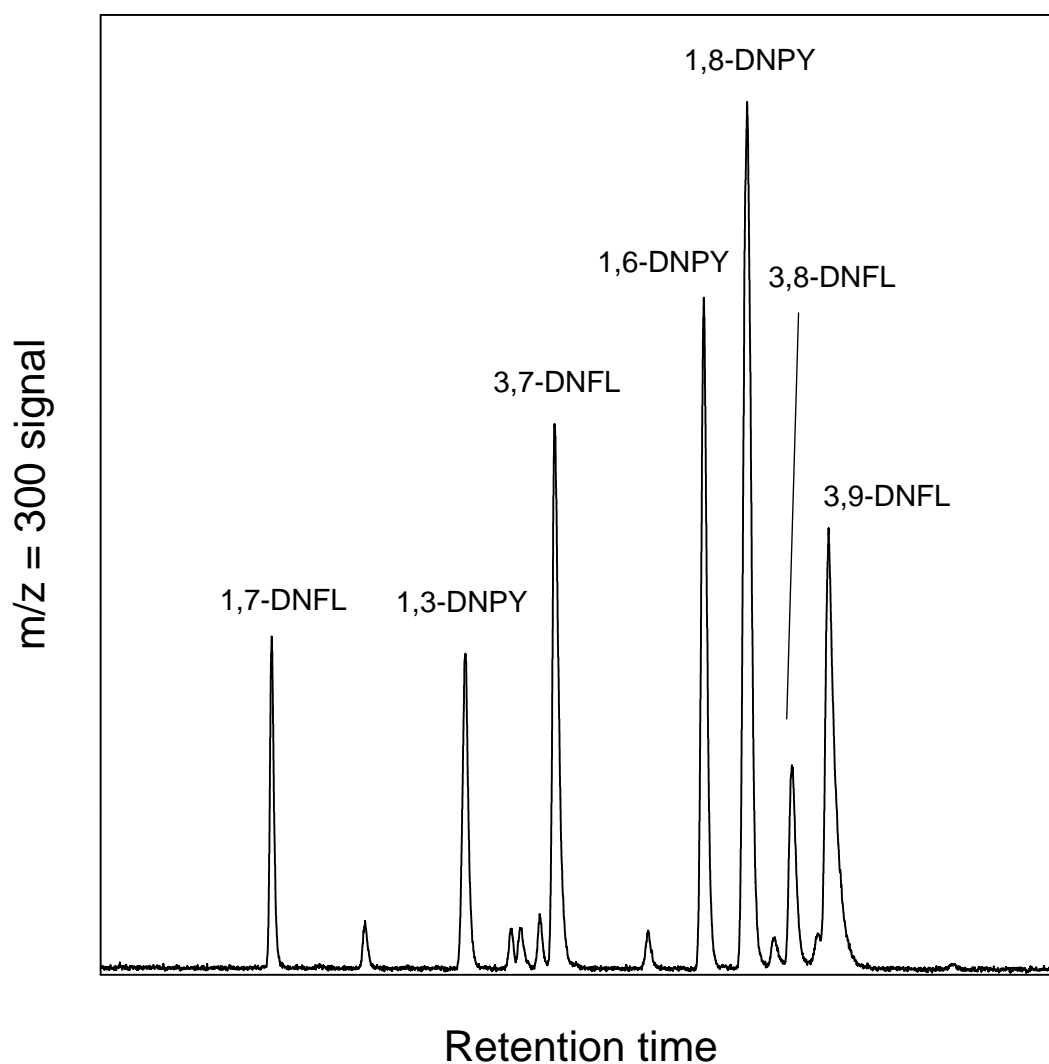

Figure S6. GC-MS/EI chromatogram with identifications of  $m/z$  300 deuterated dinitropyrenes (DNPYs) and dinitrofluoranthenes (DNFLs) (from MTC 2421). Identification of 1,3-DNPY, 1,6-DNPY, and 1,8-DNPY (and exclusion of 1,2-DNFL, see text) were made by both retention time matching with standards and previous reported fragmentation patterns. Other isomers are tentative identifications based on previously reported EI fragmentation patterns (Ramdahl et al., 1986; 1988).

## **Ambient PM Results**

The concentrations of selected PAH and nitro-PAH in ambient PM samples collected in Beijing, China, at four sites in southern California in August 1997 during the Southern California Ozone study (SCOS97), and in Riverside, CA (both in October 1997 as part of the SCOS97 study and May 2012) are given in Tables S3 and S4, respectively.

*Ambient Particulate PAH Concentrations.* PAHs are primary emissions resulting from incomplete combustion processes and Beijing is clearly highly impacted by direct emissions, with Beijing samples 1 and 2 having the highest concentrations of most PAHs (Table S3). Benzo[ghi]perylene (B(ghi)P) has been used as a marker of gasoline-powered vehicle activity, as it has the highest emission factor of the 16 priority PAHs in light-duty vehicle exhaust but is not detected in heavy-duty diesel exhaust (Marr et al., 1999; 2006). Reflecting the strong influence of vehicle traffic in the Southern California region, the top 6 B(ghi)P concentrations (all exceeding  $1 \text{ ng m}^{-3}$ ) were observed for: a Los Angeles morning sample (LA97-1), followed by the Beijing samples (Beijing 1 and 2), the Los Angeles nighttime sample (LA97-3), the second Los Angeles daytime sample (LA97-5) and an Azusa morning sample (A97-13). The Riverside 2012 samples had the lowest B(ghi)P concentrations which probably reflects a cleaner vehicle fleet than in 1997. It should also be noted that the intensive sampling days of the SCOS97 study were chosen on the basis of meteorological predictions to be conducive to producing maximum pollution levels.

*Ambient Nitro-PAH Concentrations.* Initial ambient concentrations of particle-bound molecular weight (mw) 247 and 273 nitro-PAHs were measured at all sites and are reported in Table S4. While the 2-NFL/1-NPY ratios varied, 2-NFL was consistently the mw 247 nitro-PAH isomer observed in greatest abundance. Other isomers, such as 2-NPY, 4-NPY, 3-NFL and

8-NFL were identified and measured in most, but not all, samples. The mw 273 nitro-PAHs were present in lower concentrations relative to 2-NFL, and 7-NBaA was the most consistently measured mw 273 nitro-PAH in each sample (Table S4). Other isomers observed include 12-NBaA, 1- and 2-NTP, with 6-NCHR least frequently detected. Detectable concentrations of 6-NBaP were observed only in the particulate matter collected in Beijing, China, and one Azusa morning sample.

The highest 2-NFL concentration was observed in the Beijing 1 sample, followed by a Riverside nighttime sample (R97-14). The high 2-NFL/2-NPY ratios in these samples suggest 2-NFL formation by NO<sub>3</sub> radical reaction (Zimmermann et al., 2012). Four samples exceeded 50 pg m<sup>-3</sup> for 2-NPY: the two Los Angeles and two Azusa morning samples (LA97-1, LA97-4, A97-13, and A97-18). The low 2-NFL/2-NPY ratios in these samples indicate formation of 2-NFL and 2-NPY by OH radical-initiated reaction (Zimmermann et al., 2012).



Table S3. Ambient concentrations of particle-bound PAHs ( $\mu\text{g m}^{-3}$ ) in Beijing, China and the Los Angeles air basin.<sup>a</sup> Note that depending upon the ambient temperature, a significant fraction of the FL and PY may be gas-phase and the PM concentrations given in the table, therefore, underestimate the actual ambient concentrations.

| Site <sup>b</sup>      | Time      | FL   | PY   | BaA | TP+CHR | B(b/k/j)F         | BeP  | BaP  | PER | IP   | B(ghi)P | D(a,h)A |
|------------------------|-----------|------|------|-----|--------|-------------------|------|------|-----|------|---------|---------|
| Beijing 1 <sup>c</sup> | 24-hr.    | 1431 | 990  | 594 | 827    | 4179 <sup>d</sup> | 1660 | 683  | NM  | 1645 | 1663    | 273     |
| Beijing 2 <sup>c</sup> | 24-hr.    | 2357 | 1581 | 762 | 959    | 3586 <sup>d</sup> | 1531 | 1147 | NM  | 1576 | 1639    | 119     |
| Beijing 3 <sup>c</sup> | 24-hr.    | 552  | 417  | 233 | 285    | 1596 <sup>d</sup> | 618  | 537  | NM  | 677  | 697     | 44      |
| LA97-1                 | 0600-1158 | 549  | 601  | 411 | 1323   | 1345              | 893  | 470  | 98  | 679  | 1720    | 47      |
| LA97-2                 | 1202-1800 | 316  | 351  | 129 | 461    | 496               | 272  | 149  | 27  | 245  | 520     | 18      |
| LA97-3                 | 1803-0556 | 312  | 365  | 234 | 628    | 790               | 572  | 427  | 84  | 485  | 1516    | 20      |
| LA97-4                 | 0602-1158 | 507  | 473  | 274 | 680    | 966               | 510  | 335  | 62  | 533  | 1492    | 21      |
| LA97-5                 | 1202-1800 | 236  | 254  | 92  | 693    | 295               | 292  | 74   | 21  | 97   | 270     | 16      |
| A97-13                 | 0600-1200 | 902  | 927  | 420 | 959    | 1047              | 564  | 392  | 93  | 520  | 1382    | 36      |
| A97-15                 | 1203-1800 | 568  | 504  | 178 | 684    | 603               | 286  | 167  | 41  | 256  | 611     | 19      |
| A97-16                 | 1800-0600 | 236  | 266  | 136 | 398    | 585               | 359  | 220  | 51  | 315  | 905     | 26      |

| Site <sup>b</sup> | Time      | FL  | PY  | BaA | TP+CHR | B(b/k/j)F | BeP | BaP | PER | IP  | B(ghi)P | D(a,h)A |
|-------------------|-----------|-----|-----|-----|--------|-----------|-----|-----|-----|-----|---------|---------|
| A97-18            | 0603-1200 | 360 | 350 | 149 | 501    | 593       | 302 | 174 | 38  | 300 | 727     | 21      |
| A97-20            | 1204-1800 | 266 | 247 | 74  | 316    | 306       | 142 | 89  | 22  | 114 | 249     | 17      |
| R97-13            | 0600-1802 | 188 | 199 | 91  | 235    | 455       | 219 | 113 | 22  | 208 | 443     | 19      |
| R97-14            | 1811-0600 | 243 | 272 | 100 | 299    | 316       | 187 | 94  | 20  | 132 | 361     | 15      |
| R97-15            | 0614-1750 | 137 | 134 | 55  | 127    | 206       | 104 | 58  | 11  | 96  | 197     | 9.6     |
| B97-14            | 0605-1800 | 94  | 109 | 32  | 87     | 95        | 61  | 26  | 5   | 47  | 148     | 4       |
| B97-15            | 1814-0600 | 170 | 211 | 73  | 178    | 207       | 95  | 57  | 11  | 96  | 210     | 15      |
| B97-17            | 0607-1800 | 89  | 128 | 50  | 127    | 168       | 66  | 68  | 13  | 73  | 94      | 12      |
| R2012 N1          | 1800-0600 | 55  | 61  | 10  | 45.6   | 40        | 30  | 12  | 2   | 17  | 45      | 2       |
| R2012 D1          | 0600-1800 | 70  | 84  | 14  | 122    | 51        | 55  | 17  | 4   | 20  | 59      | 2       |
| R2012 N2          | 1800-0600 | 60  | 64  | 13  | 67     | 61        | 33  | 17  | 4   | 27  | 66      | 4       |
| R2012 D2          | 0600-1800 | 78  | 82  | 17  | 130    | 62        | 59  | 21  | 4   | 25  | 67      | 4       |
| R2012 N3          | 1800-0600 | 51  | 56  | 13  | 55     | 63        | 36  | 19  | 3   | 27  | 63      | 4       |

| Site <sup>b</sup>   | Time      | FL | PY  | BaA | TP+CHR | B(b/k/j)F       | BeP | BaP | PER | IP | B(ghi)P | D(a,h)A |
|---------------------|-----------|----|-----|-----|--------|-----------------|-----|-----|-----|----|---------|---------|
| R2012 D3            | 0600-1800 | 52 | 58  | 6   | 111    | 39              | 46  | 14  | 2   | 15 | 41      | 2       |
| R2012 N4            | 1800-0600 | 53 | 61  | 14  | 52     | 48              | 30  | 17  | 4   | 23 | 61      | 3       |
| R2012 D4            | 0600-1800 | 90 | 107 | 23  | 146    | 72              | 64  | 22  | 6   | 28 | 85      | 3       |
| R97 MS <sup>e</sup> | 0555-1740 | 46 | 37  | 9   | 15     | 45 <sup>d</sup> | 33  | 8   | NM  | 28 | 45      | ND      |

<sup>a</sup> Abbreviations: FL = fluoranthene; PY = pyrene; BaA = benz[a]anthracene; TP+CHR = triphenylene + chrysene; B(b/k/j)F = benzo[b]fluoranthene + benzo[k]fluoroanthene + benzo[j]fluoranthene; BeP = benzo[e]pyrene; BaP = benzo[a]pyrene; PER = perylene; IP = indeno[1,2,3-cd]pyrene; B(ghi)P = benzo[ghi]perylene; D(a,h)A = dibenz[a,h]anthracene; NM = not measured.

<sup>b</sup> Sampling information is described in Table S1.

<sup>c</sup> Reported values for Beijing samples are mean values of 3 replicate measurements.

<sup>d</sup> Reported value is equal to sum of benzo[b]fluoranthene and benzo[k]fluoranthene concentrations.

<sup>e</sup> Reported values for R97 MS are mean values of 9 replicate measurements.

Table S4. Ambient concentrations of mw 247 and 273 nitro-PAHs and 6-nitrobenzo[a]pyrene (mw 297) measured in Beijing, China and the Los Angeles air basin ( $\text{pg m}^{-3}$ )<sup>a,b</sup>

| Site <sup>c</sup>        | Time      | 2-NFL | 3-NFL | 4-NPY | 8-NFL | 1-NPY | 2-NPY | 12-NBaA | 7-NBaA | 1-NTP | 6-NCHR | 2-NTP | 6-NBaP           |
|--------------------------|-----------|-------|-------|-------|-------|-------|-------|---------|--------|-------|--------|-------|------------------|
| Beijing 1 <sup>d,e</sup> | 24-hr.    | 1158  | 4.0   | ND    | ND    | 22.1  | 4.4   | ND      | 132    | 2.5   | 3.4    | 3.2   | 23.8             |
| Beijing 2 <sup>d,e</sup> | 24-hr.    | 597   | 4.6   | ND    | ND    | 22.6  | 43.1  | ND      | 105    | 2.6   | 0.7    | 1.9   | 26.3             |
| Beijing 3 <sup>d,e</sup> | 24-hr.    | 143   | 4.7   | ND    | ND    | 10.0  | 35.8  | ND      | 55.1   | 2.7   | 0.7    | 1.7   | 27.2             |
| LA97-1                   | 0600-1158 | 292   | ND    | 17.7  | 11.2  | 27.0  | 68.7  | 18.2    | 20.6   | ND    | ND     | ND    | ND               |
| LA97-2                   | 1202-1800 | 149   | ND    | 10.1  | ND    | 10.4  | ND    | 11.3    | 8.2    | 4.6   | ND     | 9.2   | ND               |
| LA97-3                   | 1803-0556 | 86.7  | 0.8   | 5.0   | 2.2   | 17.0  | 22.8  | 3.6     | 18.7   | 1.9   | ND     | ND    | ND               |
| LA97-4                   | 0602-1158 | 304   | ND    | 10.1  | 9.0   | 17.5  | 50.4  | 3.5     | 6.9    | 3.4   | 4.0    | 5.2   | ND               |
| LA97-5                   | 1202-1800 | 79.6  | ND    | 7.0   | ND    | 8.9   | 41.8  | 5.7     | 13.2   | 4.3   | ND     | ND    | ND               |
| A97-13                   | 0600-1200 | 197   | ND    | 6.5   | 5.3   | 18.4  | 71.3  | 2.2     | 7.6    | 2.5   | ND     | 2.9   | 4.2 <sup>f</sup> |
| A97-15                   | 1203-1800 | 210   | ND    | 9.9   | 3.4   | 8.9   | 22.9  | 2.7     | 6.7    | 2.7   | ND     | 7.7   | ND               |
| A97-16                   | 1800-0600 | 301   | ND    | 7.1   | 3.7   | 8.5   | 33.8  | 4.3     | 23.0   | ND    | ND     | 5.0   | ND               |
| A97-18                   | 0603-1200 | 215   | ND    | 5.8   | 4.5   | 12.10 | 64.8  | 1.7     | 7.7    | 1.5   | ND     | 6.0   | ND               |
| A97-20                   | 1204-1800 | 76.8  | ND    | 12.4  | ND    | 6.3   | 30.0  | 5.8     | 7.7    | 1.1   | ND     | ND    | ND               |

| Site <sup>c</sup>   | Time      | 2-NFL             | 3-NFL | 4-NPY | 8-NFL | 1-NPY | 2-NPY | 12-NBaA | 7-NBaA | 1-NTP | 6-NCHR | 2-NTP | 6-NBaP |
|---------------------|-----------|-------------------|-------|-------|-------|-------|-------|---------|--------|-------|--------|-------|--------|
| R97-13              | 0600-1802 | 166               | ND    | 6.1   | 2.9   | 6.8   | 21.0  | 3.2     | 7.0    | 2.6   | 1.8    | 3.5   | ND     |
| R97-14              | 1811-0600 | 638               | ND    | 8.3   | 1.8   | 9.6   | 27.9  | ND      | 11.7   | 3.4   | 3.5    | 2.9   | ND     |
| R97-15              | 0614-1750 | 142               | ND    | 3.2   | ND    | 3.7   | 11.5  | ND      | 4.1    | ND    | ND     | ND    | ND     |
| B97-14              | 0605-1800 | 37.6              | ND    | 2.3   | ND    | 3.1   | ND    | ND      | 2.6    | 0.8   | 0.6    | 1.9   | ND     |
| B97-15              | 1814-0600 | 201               | ND    | 11.9  | ND    | 7.8   | 7.0   | 27.7    | 12.4   | 4.0   | ND     | ND    | ND     |
| B97-17              | 0607-1800 | 28.0              | 0.2   | 1.6   | 2.2   | 1.3   | 1.6   | ND      | 0.9    | 0.6   | ND     | 1.5   | ND     |
| R2012 N1            | 1800-0600 | 11.0              | ND    | ND    | ND    | 1.2   | 1.5   | 0.8     | 1.5    | 0.2   | ND     | ND    | ND     |
| R2012 D1            | 0600-1800 | 8.3               | ND    | 0.8   | ND    | 6.8   | 3.7   | 2.2     | 2.6    | 0.8   | ND     | ND    | ND     |
| R2012 N2            | 1800-0600 | 57.4              | ND    | 2.7   | ND    | 2.6   | 2.4   | 1.7     | 10.1   | 0.4   | ND     | ND    | ND     |
| R2012 D2            | 0600-1800 | 19.2              | ND    | 1.2   | ND    | 6.6   | 2.3   | 2.3     | 2.1    | 1.0   | ND     | ND    | ND     |
| R2012 N3            | 1800-0600 | 98.2              | ND    | 1.2   | ND    | 2.7   | 1.8   | 0.9     | 2.4    | ND    | ND     | ND    | ND     |
| R2012 D3            | 0600-1800 | 8.3               | ND    | 0.6   | ND    | 3.2   | 1.0   | 3.8     | 1.1    | 0.5   | ND     | ND    | ND     |
| R2012 N4            | 1800-0600 | 75.6              | ND    | 0.8   | ND    | 1.5   | 1.2   | 1.1     | 1.3    | ND    | ND     | ND    | ND     |
| R2012 D4            | 0600-1800 | 21.8              | ND    | 0.7   | ND    | 3.9   | 1.8   | 2.7     | 0.7    | ND    | ND     | ND    | ND     |
| R97 MS <sup>c</sup> | 0555-1740 | 37.9 <sup>g</sup> | ND    | ND    | ND    | 2.1   | ND    | ND      | ND     | 0.21  | ND     | ND    | ND     |

<sup>a</sup>Abbreviations: NFL = nitrofluoranthene; NPY = nitropyrene; NBaA = nitrobenz[a]anthracene; NTP = nitrotriphenylene; NCHR = nitrochrysene; NBaP = nitrobenzo[a]pyrene; ND = not detected.

<sup>b</sup>All measurements were made on a DB-17 column unless otherwise specified.

<sup>c</sup>Sampling information is described in Table S1.

<sup>d</sup>Concentrations from each Beijing sample represent an average of 3 replicates.

<sup>e</sup>The mw 273 nitro-PAHs from Beijing samples and all isomers listed for the R97 MS sample were quantified on a DB-5MS column.

<sup>f</sup>Assumed response factor for 6-NBaP of 1.

<sup>g</sup>Quantified on a DB-5MS column as 2+3-NFL.

## Ambient PM Exposed to N<sub>2</sub>O<sub>5</sub>/NO<sub>3</sub>/NO<sub>2</sub>

*PAH Degradation.* The relative degradation of select particle-bound PAHs upon exposure to N<sub>2</sub>O<sub>5</sub>/NO<sub>3</sub>/NO<sub>2</sub> is expressed as:  $[(\Delta[\text{PAH}]/[\text{PAH}]_0) \times 100]$ , in which  $\Delta[\text{PAH}]$  is the difference between the amounts on the unreacted and reacted filters and  $[\text{PAH}]_0$  is the amount of PAH on the unreacted sample. Calculated degradation of these PAHs is given in Table S5. Degradation was observed for all reported particle-bound PAHs in Beijing PM, although the relative degradation of these PAHs differed among the three ambient Beijing samples. Results of paired *t*-test analyses of unreacted and reacted PAH concentrations (Table S5) show that statistical significance of PAH degradation is sample-dependent, with only pyrene (PY) changing significantly (*p*-value <0.05) for all three Beijing samples. PAHs that showed significant degradation in two out of the three Beijing samples included BaA, TP+CHR, B(b+k+j)F, BeP, BaP, IP, B(ghi)P. In contrast, exposure of R97 MS (consisting of 9 replicate measurements) did not result in the significant degradation of any of the measured PAHs (Table S5). Variable PAH degradation was also observed for PM collected during SCOS97 and in Riverside in 2012, with no loss detected for several PAHs in these samples. Therefore, considering the large losses of deuterated PAHs in the chamber exposures (Figure S3), it is clear that some fraction of the PAH present in ambient particles is unavailable for reaction.

Loss of BaP was observed in all but one of the samples exposed, while no loss of BeP was observed for several samples. As noted in the manuscript, BeP is considered a relatively unreactive PAH, while BaP is considered reactive. Our data are consistent with these findings as shown in Table S6, where the BaP/BeP ratios of the unexposed PM were higher than the corresponding ratio for the exposed PM for 78% of the samples. Therefore, as discussed below, to compare relative amounts of atmospheric processing in samples from various sites and times, we have chosen to ratio the PAHs and their atmospheric reaction products to the initial BeP

concentration as a way of normalizing the ambient samples for the strength of direct emissions and meteorological differences such as inversion heights.

*Nitro-PAH Formation and Loss.* For the majority of samples, 1-NPY was formed in the greatest amounts (Table S7). Other isomers consistently formed, but to lesser extents, included 3-NFL, 8-NFL, and 6-NCHR (Figure 2 and Figure S7). Formation of nitro-PAHs such as 12- and 7-NBaA and 1- and 2-NTP was less consistent, but was observed in > 60% of the samples studied (Figure S7). Results of paired *t*-test analyses of unreacted and reacted nitro-PAH concentrations (Table S7) showed statistically significant formation of 1-NPY, 7-NBaA, 6-NCHR, 2-NTP, and 6-NBaP in all three Beijing samples and the 6-NBaP formation in these samples exceeded that of 1-NPY. Formation of 3-NFL and 1-NTP was statistically significant for two of the three Beijing samples. Thus the nitro-isomers formed in the exposed ambient PM were the same isomers observed from the PAH-d<sub>x</sub> coated on filters. Formation of these isomers in our ambient PM exposures is not only consistent with these deuterated filter studies, but also with earlier studies of heterogeneous formation of nitro-PAHs from reactions of filter-bound PY, FL, BaA, and BaP (Pitts et al., 1985b).

In contrast, 2-NFL and 4-NPY, nitro-PAHs formed from gas-phase reaction of FL and PY with NO<sub>3</sub> radicals, respectively, were not enhanced by exposure to N<sub>2</sub>O<sub>5</sub>/NO<sub>3</sub>/NO<sub>2</sub>, but rather were degraded in 70% of samples. Formation in the Beijing samples of 2-NPY, which has been shown to result from the OH radical-initiated reaction of gas-phase PY (Atkinson et al., 1990), was not statistically significant (Table S7). In fact, the changes for both 2-NFL and 2-NPY in the Beijing samples were shown to be statistically insignificant, as were those for nitro-PAHs measured in the R97 MS sample. These results, as well as the results of the FL-d<sub>10</sub> and PY-d<sub>10</sub> exposures discussed above, call into question a recent report of heterogeneous formation of 2-NFL and 2-NPY during ambient PM exposures (Ringuet et al., 2012).



Table S5. Percent change ( $\Delta[\text{PAH}]/[\text{PAH}]_0$ ) in particle-bound PAHs after exposure to 8 additions of  $\text{N}_2\text{O}_5^{\text{a, b}}$ . Numbers that are underlined in bold represent significant changes using the paired  $t$ -test ( $p < 0.05$ )

| Site <sup>c</sup>      | Time      | FL                            | PY                            | BaA                           | TP+CHR                         | B(b/k/j)F                        | BeP                           | BaP                           | PER  | IP                             | B(ghi)P                       | D(a,h)A                       |
|------------------------|-----------|-------------------------------|-------------------------------|-------------------------------|--------------------------------|----------------------------------|-------------------------------|-------------------------------|------|--------------------------------|-------------------------------|-------------------------------|
| Beijing 1 <sup>d</sup> | 24-hr.    | <u><b>-20<sup>e</sup></b></u> | <u><b>-25<sup>e</sup></b></u> | <u><b>-29<sup>e</sup></b></u> | <u><b>-7.3<sup>e</sup></b></u> | <u><b>-7.2<sup>e,g</sup></b></u> | <u><b>-10<sup>e</sup></b></u> | <u><b>-35<sup>e</sup></b></u> | NM   | <u><b>-8.3<sup>e</sup></b></u> | <u><b>-16<sup>e</sup></b></u> | -7.2 <sup>f</sup>             |
| Beijing 2 <sup>d</sup> | 24-hr.    | -1.9 <sup>f</sup>             | <u><b>-25<sup>e</sup></b></u> | -18 <sup>f</sup>              | -7.2 <sup>f</sup>              | -6.7 <sup>f,g</sup>              | -6.2 <sup>f</sup>             | -25 <sup>f</sup>              | NM   | -1.7 <sup>f</sup>              | -7.8 <sup>f</sup>             | NLD                           |
| Beijing 3 <sup>d</sup> | 24-hr.    | -3.7 <sup>f</sup>             | <u><b>-42<sup>e</sup></b></u> | <u><b>-32<sup>e</sup></b></u> | <u><b>-11<sup>e</sup></b></u>  | <u><b>-14<sup>e,g</sup></b></u>  | <u><b>-15<sup>e</sup></b></u> | <u><b>-35<sup>e</sup></b></u> | NM   | <u><b>-14<sup>e</sup></b></u>  | <u><b>-18<sup>e</sup></b></u> | <u><b>-14<sup>e</sup></b></u> |
| LA97-1                 | 0600-1158 | -4.7                          | -13                           | -7.9                          | -14                            | NLD                              | -2.5                          | -25                           | -36  | NLD                            | NLD                           | NLD                           |
| LA97-2                 | 1202-1800 | -17                           | -23                           | -16                           | -9.8                           | NLD                              | -4.9                          | -17                           | NLD  | -3.4                           | -11                           | NLD                           |
| LA97-3                 | 1803-0556 | -14                           | -37                           | -29                           | -24                            | -6.5                             | -14                           | -50                           | -58  | -8.5                           | -14                           | NLD                           |
| LA97-4                 | 0602-1158 | -24                           | -28                           | -37                           | -24                            | -11                              | -13                           | -32                           | -28  | -13                            | -18                           | -16                           |
| LA97-5                 | 1202-1800 | -25                           | -28                           | -23                           | -35                            | -6.3                             | -24                           | -2.9                          | -4.2 | -0.6                           | -3.7                          | NLD                           |
| A97-13                 | 0600-1200 | -13                           | -20                           | -10                           | -0.4                           | -1.0                             | -1.9                          | -32                           | -36  | -1.6                           | -7.5                          | -4.3                          |
| A97-15                 | 1203-1800 | -11                           | -16                           | -18                           | -5.9                           | NLD                              | NLD                           | -21                           | -23  | NLD                            | -3.0                          | NLD                           |
| A97-16                 | 1800-0600 | -0.6                          | -8.3                          | -0.9                          | NLD                            | NLD                              | NLD                           | -18                           | -12  | NLD                            | NLD                           | NLD                           |
| A97-18                 | 0603-1200 | -2.6                          | -4.1                          | NLD                           | NLD                            | NLD                              | NLD                           | -7.8                          | NLD  | NLD                            | NLD                           | -5.0                          |
| A97-20                 | 1204-1800 | -4.6                          | -3.8                          | -13                           | -9.6                           | NLD                              | NLD                           | NLD                           | -6.6 | NLD                            | -4.5                          | NLD                           |
| R97-13                 | 0600-1802 | -7.4                          | -14                           | -5.3                          | -9.0                           | -4.2                             | -9.8                          | -23                           | -18  | NLD                            | -6.9                          | -1.1                          |
| R97-14                 | 1811-0600 | -19                           | -28                           | -26                           | -22                            | -13                              | -17                           | -19                           | -42  | -3.7                           | -10                           | NLD                           |

| Site <sup>e</sup>   | Time      | FL   | PY                | BaA              | TP+CHR            | B(b/k/j)F           | BeP               | BaP               | PER  | IP                | B(ghi)P | D(a,h)A |
|---------------------|-----------|------|-------------------|------------------|-------------------|---------------------|-------------------|-------------------|------|-------------------|---------|---------|
| R97-15              | 0614-1750 | -2.7 | NLD               | NLD              | NLD               | NLD                 | NLD               | NLD               | -3.6 | NLD               | NLD     | NLD     |
| B97-14              | 0605-1800 | -26  | -35               | -17              | -9.0              | NLD                 | -7.6              | -29               | -3.1 | -2.0              | -17     | NLD     |
| B97-15              | 1814-0600 | -19  | -22               | -22              | -11               | -3.0                | NLD               | -19               | -33  | -5.6              | -1.5    | -13     |
| B97-17              | 0607-1800 | -23  | -32               | -15              | -16               | -9.9                | -16               | -28               | -34  | -10               | -16     | -7.1    |
| R2012 N1            | 1800-0600 | -9.2 | -23               | -13              | NLD               | NLD                 | NLD               | -11               | -24  | NLD               | NLD     | NLD     |
| R2012 D1            | 0600-1800 | -5.4 | -16               | -26              | -35               | -11                 | -48               | -24               | -30  | -8.7              | -7.8    | NLD     |
| R2012 N2            | 1800-0600 | -11  | -13               | -11              | NLD               | -5.4                | NLD               | -30               | -32  | -8.5              | -6.9    | -10     |
| R2012 D2            | 0600-1800 | -16  | -19               | -7.8             | -36               | -5.3                | -30               | -12               | -5.1 | NLD               | NLD     | NLD     |
| R2012 N3            | 1800-0600 | -19  | NLD               | -29              | NLD               | -5.6                | -4.1              | -23               | -5.8 | -4.7              | -1.3    | -8.5    |
| R2012 D3            | 0600-1800 | -27  | -32               | NLD              | -52               | -9.5                | -47               | -32               | -43  | -2.0              | -4.4    | -5.0    |
| R2012 N4            | 1800-0600 | -5.3 | -19               | -24              | -7.0              | NLD                 | -5.0              | -38               | -31  | -9.0              | -7.9    | -3.5    |
| R2012 D4            | 0600-1800 | -15  | -27               | -25              | -36               | -13                 | -34               | -21               | -42  | -11               | -6.7    | -14     |
| R97 MS <sup>h</sup> | 0555-1740 | NLD  | -4.0 <sup>f</sup> | -37 <sup>f</sup> | -1.6 <sup>f</sup> | -6.5 <sup>f,g</sup> | -2.8 <sup>f</sup> | -6.0 <sup>f</sup> | NM   | -3.9 <sup>f</sup> | NLD     | NLD     |

<sup>a</sup>Abbreviations: FL = fluoranthene; PY = pyrene; BaA = benz[a]anthracene; TP+CHR = triphenylene + chrysene; B(b/k/j)F = benzo[b]fluoranthene + benzo[k]fluoroanthene + benzo[j]fluoranthene; BeP = benzo[e]pyrene; BaP = benzo[a]pyrene; PER = perylene; IP = indeno[1,2,3-cd]pyrene; B(ghi)P = benzo[ghi]perylene; D(a,h)A = dibenz[a,h]anthracene; NM = not measured; NLD = no loss detected.

<sup>b</sup>Negative signs denote losses upon exposure to N<sub>2</sub>O<sub>5</sub>/NO<sub>3</sub>/NO<sub>2</sub>.

<sup>c</sup>Sampling information is described in Table S1.

<sup>d</sup>Reported values for Beijing samples are an average of 3 replicate measurements.

<sup>e</sup>Denotes a  $p$ -value  $<0.05$  for the paired  $t$ -test suggesting a significant change in concentration due to exposure to  $\text{N}_2\text{O}_5/\text{NO}_3/\text{NO}_2$ .

<sup>f</sup>Denotes a  $p$ -value  $>0.05$  for the paired  $t$ -test suggesting no significant difference in concentration due to exposure to  $\text{N}_2\text{O}_5/\text{NO}_3/\text{NO}_2$ .

<sup>g</sup>Changes calculated by finding the difference in the sums of benzo[b]fluoranthene and benzo[k]fluoranthene concentrations.

<sup>h</sup>Reported values for RMS are averages of 9 replicate measurements.

Table S6. Ratios of particulate BaP/BeP<sup>a</sup>

| Site <sup>b</sup>      | Time      | BaP/BeP<br>unexposed <sup>c</sup> | BaP/BeP<br>exposed <sup>d</sup> |
|------------------------|-----------|-----------------------------------|---------------------------------|
| Beijing 1 <sup>e</sup> | 24-hr.    | 0.41                              | 0.24                            |
| Beijing 2 <sup>e</sup> | 24-hr.    | 0.75                              | 0.60                            |
| Beijing 3 <sup>e</sup> | 24-hr.    | 0.86                              | 0.50                            |
| LA97-1                 | 0600-1158 | 0.53                              | 0.41                            |
| LA97-2                 | 1202-1800 | 0.55                              | 0.48                            |
| LA97-3                 | 1803-0556 | 0.75                              | 0.44                            |
| LA97-4                 | 0602-1158 | 0.66                              | 0.51                            |
| LA97-5                 | 1202-1800 | 0.25                              | 0.33                            |
| A97-13                 | 0600-1200 | 0.69                              | 0.48                            |
| A97-15                 | 1203-1800 | 0.59                              | 0.45                            |
| A97-16                 | 1800-0600 | 0.61                              | 0.43                            |
| A97-18                 | 0603-1200 | 0.58                              | 0.45                            |
| A97-20                 | 1204-1800 | 0.63                              | 0.65                            |
| R97-13                 | 0600-1802 | 0.52                              | 0.44                            |
| R97-14                 | 1811-0600 | 0.50                              | 0.49                            |
| R97-15                 | 0614-1750 | 0.56                              | 0.54                            |
| B97-14                 | 0605-1800 | 0.42                              | 0.32                            |
| B97-15                 | 1814-0600 | 0.61                              | 0.43                            |
| B97-17                 | 0607-1800 | 1.03                              | 0.88                            |

| Site <sup>b</sup> | Time      | BaP/BeP unexposed <sup>c</sup> | BaP/BeP exposed <sup>d</sup> |
|-------------------|-----------|--------------------------------|------------------------------|
| R2012 N1          | 1800-0600 | 0.54                           | 0.43                         |
| R2012 D1          | 0600-1800 | 0.31                           | 0.45                         |
| R2012 N2          | 1800-0600 | 0.53                           | 0.37                         |
| R2012 D2          | 0600-1800 | 0.35                           | 0.44                         |
| R2012 N3          | 1800-0600 | 0.52                           | 0.41                         |
| R2012 D3          | 0600-1800 | 0.30                           | 0.39                         |
| R2012 N4          | 1800-0600 | 0.56                           | 0.37                         |
| R2012 D4          | 0600-1800 | 0.34                           | 0.41                         |
| R97 MS            | 0555-1740 | f                              | f                            |

<sup>a</sup>Abbreviations: BaP = benzo[a]pyrene; BeP = benzo[e]pyrene.

<sup>b</sup>Sampling information is described in Table S1.

<sup>c</sup>Initial ratios of BaP/BeP observed from ambient particulate matter .

<sup>d</sup>Ratios of BaP/BeP after filters samples were exposed to 8 additions of N<sub>2</sub>O<sub>5</sub> and NO<sub>2</sub>. Additions were performed once per hour.

<sup>e</sup>Reported Beijing ratios are each the mean value of 3 replicate measurements.

<sup>f</sup>Of nine replicates, only one contained measureable BaP concentrations.

Table S7. Change in selected ambient particle-bound nitro-PAHs ( $\Delta$  ng = reacted – unreacted) upon exposure to  $N_2O_5/NO_3/NO_2^{a, b}$ .  
 Numbers that are underlined in bold represent significant changes using the paired *t*-test ( $p < 0.05$ )

| Site                   | Time      | 2-NFL             | 3-NFL                          | 4-NPY | 8-NFL | 1-NPY                         | 2-NPY            | 12-NBaA | 7-NBaA                        | 1-NTP                          | 6-NCHR                         | 2-NTP                          | 6-NBaP                         |
|------------------------|-----------|-------------------|--------------------------------|-------|-------|-------------------------------|------------------|---------|-------------------------------|--------------------------------|--------------------------------|--------------------------------|--------------------------------|
| Beijing 1 <sup>c</sup> | 24-hr.    | -27 <sup>e</sup>  | <b><u>14</u></b> <sup>d</sup>  | NM    | NM    | <b><u>83</u></b> <sup>d</sup> | 1.6 <sup>e</sup> | NM      | <b><u>19</u></b> <sup>d</sup> | <b><u>3.2</u></b> <sup>d</sup> | <b><u>24</u></b> <sup>d</sup>  | <b><u>5.2</u></b> <sup>d</sup> | <b><u>86</u></b> <sup>d</sup>  |
| Beijing 2 <sup>c</sup> | 24-hr.    | 1.7 <sup>e</sup>  | 5.7 <sup>e</sup>               | NM    | NM    | <b><u>67</u></b> <sup>d</sup> | 0.7 <sup>e</sup> | NM      | <b><u>10</u></b> <sup>d</sup> | <b><u>0.5</u></b> <sup>d</sup> | <b><u>6.7</u></b> <sup>d</sup> | <b><u>1.0</u></b> <sup>d</sup> | <b><u>185</u></b> <sup>d</sup> |
| Beijing 3 <sup>c</sup> | 24-hr.    | -0.3 <sup>e</sup> | <b><u>5.7</u></b> <sup>d</sup> | NM    | NM    | <b><u>61</u></b> <sup>d</sup> | 2.3 <sup>e</sup> | NM      | <b><u>20</u></b> <sup>d</sup> | 1.2 <sup>e</sup>               | <b><u>11</u></b> <sup>d</sup>  | <b><u>1.2</u></b> <sup>d</sup> | <b><u>165</u></b> <sup>d</sup> |
| LA97-1                 | 0600-1158 | -3.9              | 0.3                            | -0.3  | 0.4   | 4.4                           | 0.4              | 0.5     | 1.3                           | 6.8                            | 3.7                            | 5.5                            | ND                             |
| LA97-2                 | 1202-1800 | -0.1              | 0.3                            | -0.5  | 1.0   | 3.1                           | ND               | -0.4    | 0.1                           | 0.2                            | 0.4                            | -0.1                           | ND                             |
| LA97-3                 | 1803-0556 | -5.2              | 0.7                            | -0.3  | 1.1   | 14                            | -1.4             | 0.5     | 1.1                           | 1.7                            | 1.9                            | 2.2                            | 3.0                            |
| LA97-4                 | 0602-1158 | -6.6              | 0.7                            | -0.6  | 1.0   | 4.3                           | -0.4             | 0.2     | 0.6                           | 0.1                            | 0.3                            | 0.1                            | 2.8                            |
| LA97-5                 | 1202-1800 | -0.1              | 0.0                            | 0.1   | 0.6   | 1.7                           | -1.2             | 0.4     | 1.4                           | 7.0                            | 4.2                            | 7.5                            | ND                             |
| A97-13                 | 0600-1200 | -2.5              | 0.8                            | 0.0   | 1.5   | 8.9                           | 0.8              | 0.2     | 0.9                           | 0.1                            | 0.6                            | 0.6                            | -4.2                           |
| A97-15                 | 1203-1800 | -4.2              | 0.4                            | -0.1  | 0.9   | 3.9                           | -0.7             | 0.0     | 0.4                           | 0.1                            | 0.5                            | 0.0                            | ND                             |
| A97-16                 | 1800-0600 | -4.2              | 0.4                            | -0.1  | 0.9   | 6.0                           | 2.0              | 0.0     | 1.3                           | 0.7                            | 0.9                            | 0.3                            | ND                             |
| A97-18                 | 0603-1200 | -5.0              | 0.4                            | 0.2   | 0.8   | 3.5                           | 0.0              | 0.5     | 1.5                           | 0.4                            | 0.8                            | 0.8                            | ND                             |
| A97-20                 | 1204-1800 | -0.2              | 0.3                            | -0.7  | 0.6   | 1.3                           | -1.7             | -0.3    | -0.2                          | 0.2                            | 0.3                            | 0.6                            | ND                             |
| R97-13                 | 0600-1802 | -2.1              | 0.3                            | -0.4  | 0.4   | 2.1                           | 0.1              | 0.0     | 0.0                           | 0.0                            | 0.2                            | 0.1                            | ND                             |
| R97-14                 | 1811-0600 | -17               | 0.5                            | -0.5  | 0.7   | 3.8                           | -0.4             | 0.8     | -1.0                          | -0.3                           | -0.2                           | -0.3                           | ND                             |
| R97-15                 | 0614-1750 | -3.8              | 0.4                            | -0.1  | 0.8   | 1.3                           | 1.3              | 0.0     | -0.3                          | 0.3                            | 0.0                            | 0.0                            | ND                             |
| B97-14                 | 0605-1800 | -3.1              | 0.5                            | -0.2  | 0.6   | 2.7                           | ND               | 0.7     | -0.3                          | 0.0                            | 0.0                            | -0.2                           | ND                             |

| Site                | Time      | 2-NFL             | 3-NFL | 4-NPY | 8-NFL | 1-NPY              | 2-NPY | 12-NBaA | 7-NBaA | 1-NTP | 6-NCHR | 2-NTP | 6-NBaP |
|---------------------|-----------|-------------------|-------|-------|-------|--------------------|-------|---------|--------|-------|--------|-------|--------|
| B97-15              | 1814-0600 | -0.6              | 0.0   | -1.2  | 0.0   | 0.4                | -0.4  | -4.4    | -1.0   | -0.2  | 0.0    | 0.0   | ND     |
| B97-17              | 0607-1800 | -0.6              | 0.3   | -0.1  | 0.1   | 1.9                | 0.0   | 0.1     | 0.0    | 0.0   | 0.3    | 0.0   | ND     |
| R2012 N1            | 1800-0600 | 0.3               | 0.3   | 0.0   | 0.3   | 8.9                | -0.7  | 2.1     | 0.1    | 0.0   | 0.3    | 0.1   | ND     |
| R2012 D1            | 0600-1800 | -0.3              | 0.4   | 0.0   | 0.4   | 2.1                | -0.3  | -0.3    | 0.2    | 0.5   | 2.2    | 2.6   | ND     |
| R2012 N2            | 1800-0600 | -6.9              | 0.0   | -0.6  | 0.2   | 1.8                | -0.4  | -0.2    | -3.2   | 0.1   | 0.3    | 0.0   | ND     |
| R2012 D2            | 0600-1800 | -0.9              | 0.4   | -0.5  | 0.0   | 0.1                | -1.0  | -0.4    | 0.7    | 0.8   | 2.7    | 3.8   | ND     |
| R2012 N3            | 1800-0600 | -13               | 0.0   | 0.3   | 0.0   | 1.0                | 0.2   | 1.0     | 1.4    | 0.0   | 0.0    | 0.0   | ND     |
| R2012 D3            | 0600-1800 | -1.7              | 0.3   | 0.0   | 0.6   | 0.8                | 0.6   | -0.1    | 1.1    | 0.8   | 3.5    | 3.2   | ND     |
| R2012 N4            | 1800-0600 | -2.9              | 0.1   | 0.0   | 0.0   | 2.7                | -0.5  | 0.0     | 0.1    | 0.0   | 0.0    | 0.0   | ND     |
| R2012 D4            | 0600-1800 | -1.2              | 0.3   | -0.1  | 0.0   | 0.6                | -0.8  | -0.4    | 0.6    | 0.7   | 3.0    | 2.3   | ND     |
| R97 MS <sup>f</sup> | 0555-1740 | -0.3 <sup>e</sup> | ND    | ND    | ND    | -0.01 <sup>e</sup> | ND    | ND      | ND     | ND    | ND     | ND    | ND     |

<sup>a</sup>Abbreviations: NFL = nitrofluoranthene; NPY = nitropyrene; NBaA = nitrobenz[a]anthracene; NTP = nitrotriphenylene; NCHR = nitrochrysene; NBaP = nitrobenzo[a]pyrene; NM = not measured; ND= not detected.

<sup>b</sup>Negative signs denote loss in concentration upon exposure to N<sub>2</sub>O<sub>5</sub>/NO<sub>3</sub>/NO<sub>2</sub>.

<sup>c</sup>Mean change calculated from three replicate sets of measurements.

<sup>d</sup>Denotes a *p*-value <0.05 for the paired *t*-test suggesting a significant change in concentration due to exposure to N<sub>2</sub>O<sub>5</sub>/NO<sub>3</sub>/NO<sub>2</sub>.

<sup>e</sup>Denotes a *p*-value >0.05 for the paired *t*-test suggesting no significant difference in concentration due to exposure to N<sub>2</sub>O<sub>5</sub>/NO<sub>3</sub>/NO<sub>2</sub>.

<sup>f</sup>Mean change calculated from nine replicate sets of measurements.

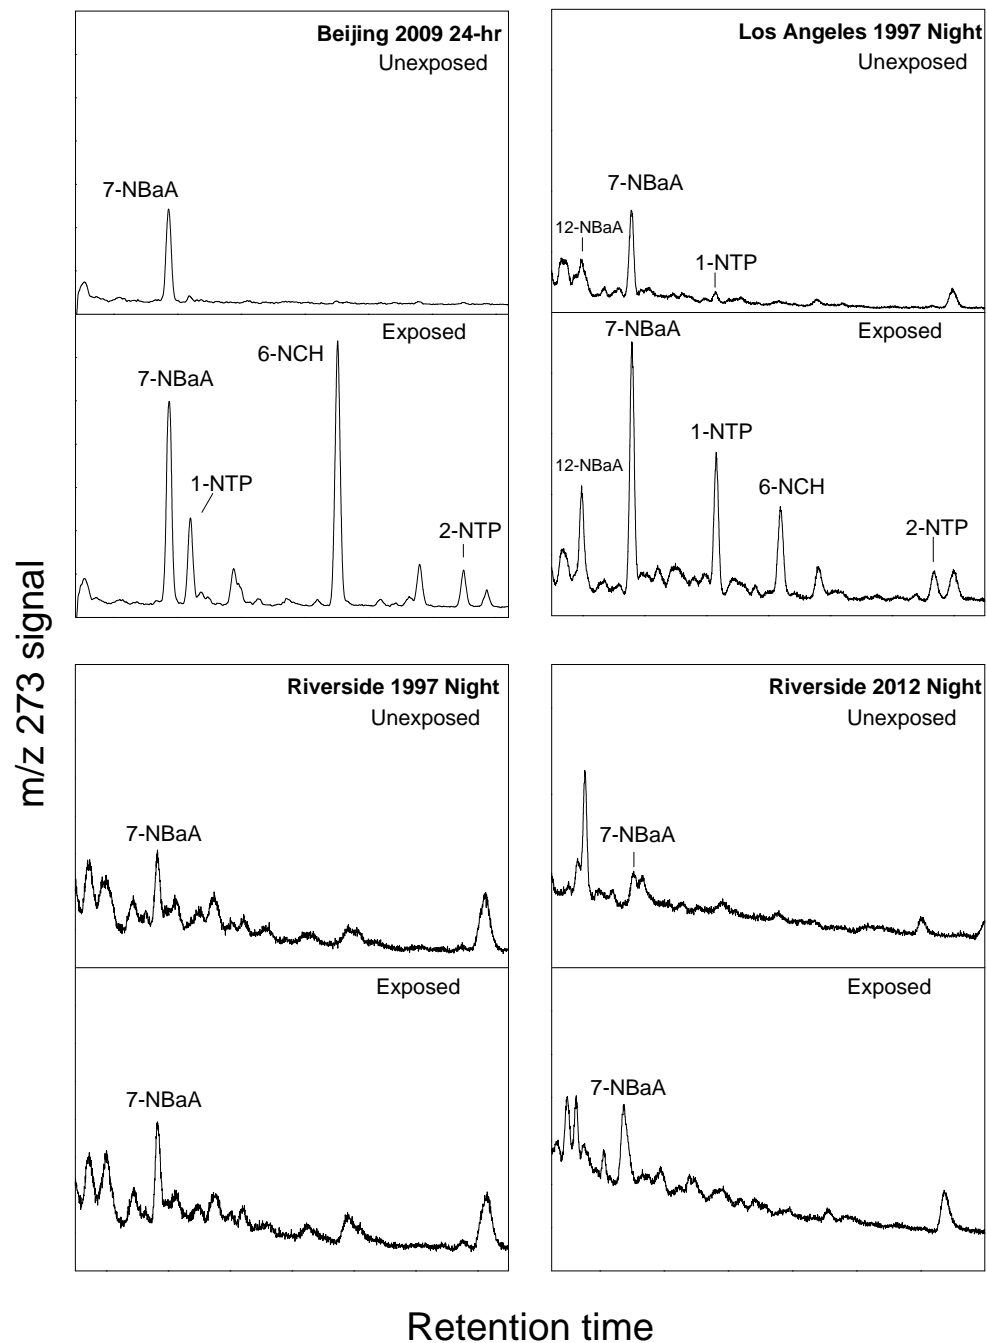

Figure S7. GC-MS/NCI chromatograms of m/z 273 for unexposed and exposed (to  $\text{N}_2\text{O}_5/\text{NO}_3/\text{NO}_2$ ) particulate matter collected in Beijing 2009 (top left), Los Angeles 1997 night (top right), Riverside 1997 night (bottom left), and Riverside 2012 night (bottom right) to  $\text{N}_2\text{O}_5$ . The unexposed and exposed chromatograms for each site are shown on the same scale relative to one another.



Table S8. Ratios of ambient 2-NFL/1-NPY, 2-NFL/BeP, Reactivity toward nitration<sup>a</sup>, 2-NFL/2-NPY and 1-NPY/BeP for ambient particulate samples collected in Beijing, China and the Los Angeles air basin (1997 and 2012)<sup>b</sup>

| Site                   | Time      | 2-NFL/1-NPY | 2-NFL/BeP | Reactivity | 2-NFL/2-NPY        | 1-NPY/BeP |
|------------------------|-----------|-------------|-----------|------------|--------------------|-----------|
| Beijing 1 <sup>c</sup> | 24-hr.    | 52.9        | 0.70      | 37.58      | 173.9 <sup>d</sup> | 0.013     |
| Beijing 2 <sup>c</sup> | 24-hr.    | 26.4        | 0.39      | 18.12      | 13.9               | 0.015     |
| Beijing 3 <sup>c</sup> | 24-hr.    | 14.4        | 0.23      | 65.40      | 4.0                | 0.016     |
| LA97-1                 | 0600-1158 | 10.8        | 0.33      | 7.36       | 4.2                | 0.030     |
| LA97-2                 | 1202-1800 | 14.3        | 0.55      | 8.70       | ND                 | 0.038     |
| LA97-3                 | 1803-0556 | 5.1         | 0.15      | 19.76      | 3.8                | 0.030     |
| LA97-4                 | 0602-1158 | 17.4        | 0.60      | 9.17       | 6.0                | 0.034     |
| LA97-5                 | 1202-1800 | 9.0         | 0.27      | 6.55       | 1.9                | 0.030     |
| A97-13                 | 0600-1200 | 10.7        | 0.35      | 9.59       | 2.8                | 0.033     |
| A97-15                 | 1203-1800 | 23.7        | 0.73      | 7.70       | 9.2                | 0.031     |
| A97-16                 | 1800-0600 | 35.3        | 0.84      | 11.32      | 8.9                | 0.024     |
| A97-18                 | 0603-1200 | 17.7        | 0.71      | 10.01      | 3.3                | 0.040     |
| A97-20                 | 1204-1800 | 12.1        | 0.54      | 5.35       | 2.6                | 0.045     |
| R97-13                 | 0600-1802 | 24.3        | 0.76      | 5.40       | 7.9                | 0.031     |
| R97-14                 | 1811-0600 | 66.7        | 3.40      | 6.99       | 22.8               | 0.051     |
| R97-15                 | 0614-1750 | 38.5        | 1.36      | 4.89       | 12.3               | 0.035     |
| B97-14                 | 0605-1800 | 12.3        | 0.61      | 12.60      | ND                 | 0.050     |
| B97-15                 | 1814-0600 | 25.8        | 2.12      | 1.05       | 28.7               | 0.082     |
| B97-17                 | 0607-1800 | 21.4        | 0.42      | 7.33       | 17.9               | 0.020     |
| R2012 N1               | 1800-0600 | 9.5         | 0.48      | 32.67      | 7.3                | 0.051     |
| R2012 D1               | 0600-1800 | 1.2         | 0.15      | 5.67       | 2.2                | 0.124     |
| R2012 N2               | 1800-0600 | 22.0        | 1.75      | 6.14       | 23.8               | 0.079     |

| Site                | Time      | 2-NFL/1-NPY | 2-NFL/BeP | Reactivity | 2-NFL/2-NPY | 1-NPY/BeP |
|---------------------|-----------|-------------|-----------|------------|-------------|-----------|
| R2012 D2            | 0600-1800 | 2.9         | 0.32      | 0.36       | 8.5         | 0.112     |
| R2012 N3            | 1800-0600 | 36.8        | 2.73      | 3.93       | 54.9        | 0.074     |
| R2012 D3            | 0600-1800 | 2.6         | 0.18      | 3.24       | 7.9         | 0.070     |
| R2012 N4            | 1800-0600 | 50.4        | 2.52      | 9.96       | 61.0        | 0.050     |
| R2012 D4            | 0600-1800 | 5.6         | 0.34      | 1.27       | 11.8        | 0.061     |
| R97 MS <sup>e</sup> | 0555-1740 | 19.2        | 1.17      | 0.50       | ND          | 0.066     |

<sup>a</sup>Reactivity toward nitration is expressed by:  $\text{reactivity} = (\Delta[1\text{-NPY}]/[\text{PY}]_0) \times 100$  where  $\Delta[1\text{-NPY}]$  is the change (exposed filter - unexposed filter) in 1-NPY and  $[\text{PY}]_0$  is the original amount of PY measured on each unexposed filter.

<sup>b</sup>Ratios for unexposed ambient samples. Abbreviations: NFL = nitrofluoranthene; NPY = nitropyrene; BeP = benzo[e]pyrene; ND = 2-NPY not detected.

<sup>c</sup>Values are reported as the mean of three replicate measurements.

<sup>d</sup>Mean value calculated from only 2 of 3 replicates due to a possible outlier or measurement error.

<sup>e</sup>Values are reported as the mean of nine replicate measurements.

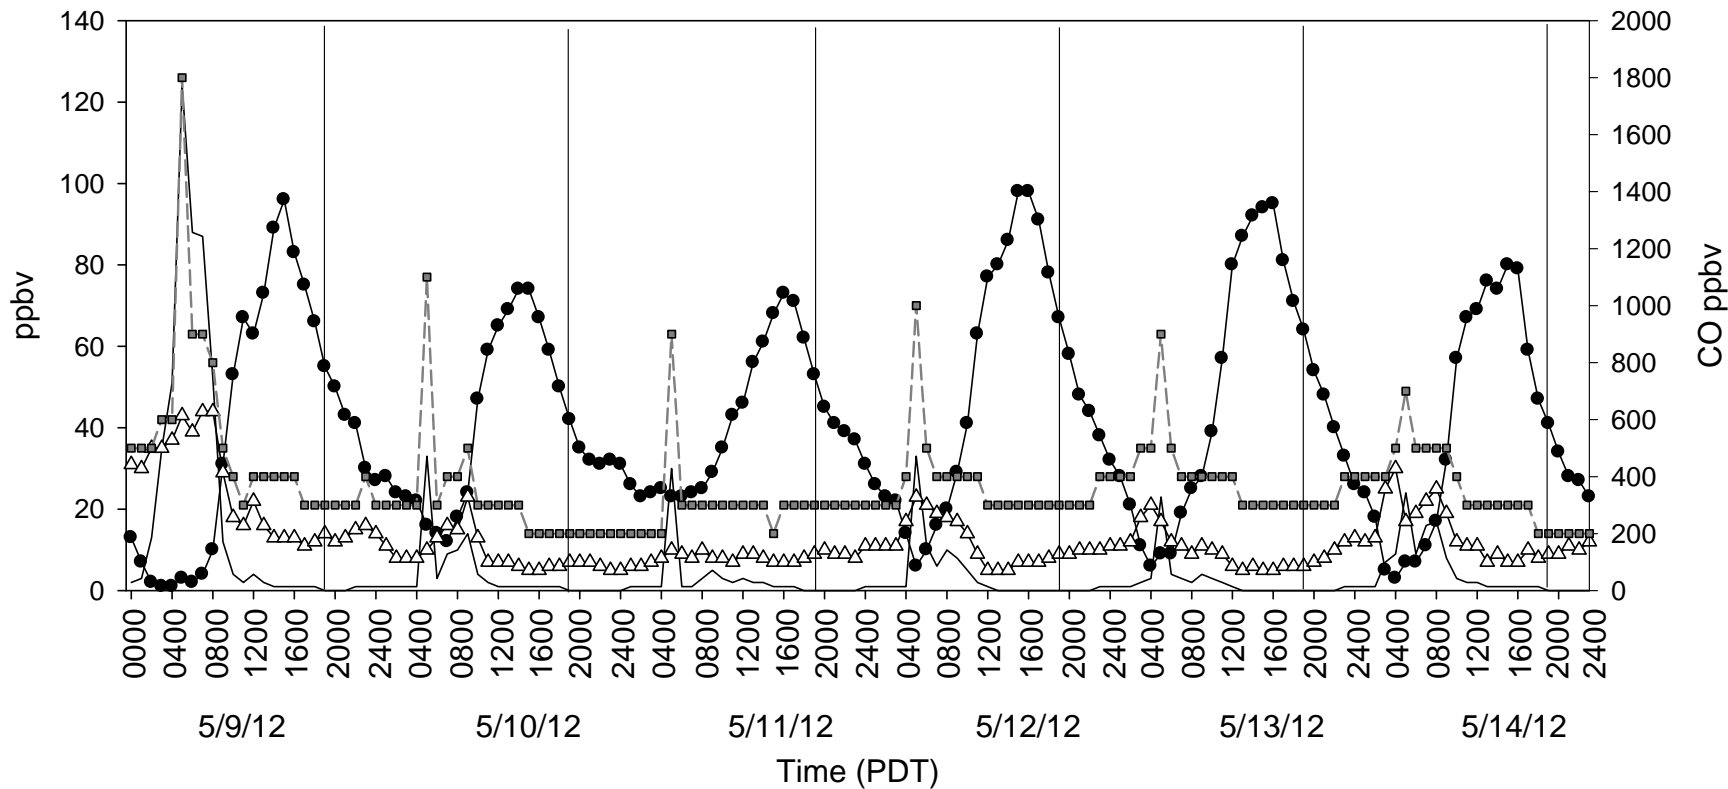

Figure S8. Hourly co-pollutant data for Riverside 2012 sampling. Vertical lines represent the approximate times of sunset during sampling (19:45). Sampling periods began on May 10, 2012 from 1800-0600 and continued at 12-hr intervals until May 14, 2012 from 0600-1800. ●, Hourly average O<sub>3</sub> measurements; △, hourly average NO<sub>2</sub> measurements; —, hourly average NO; --□--, hourly average CO (refer to right-hand axis). Data from California Air Resources Board.

## **SCOS97**

Figure S9 shows the co-pollutant data for August 22-23, 1997 (the 3<sup>rd</sup> Intensive sampling of the SCOS97 campaign) taken from the California Air Resources Board (CARB) website (<http://www.arb.ca.gov>). Sampling was started at 0600 hr on August 22 and ended at 1800 hr on August 23.

Figures S10, S11 and S12 utilize the filter-adsorbed PAH and nitro-PAH data from Tables S3 and S4, the naphthalene and 3-nitrobiphenyl data reported in Atkinson et al., 2001 (available from the CARB website) and methylnitronaphthalene and dimethylnitronaphthalene data from re-analysis of the PUF plug extracts archived from 1997.

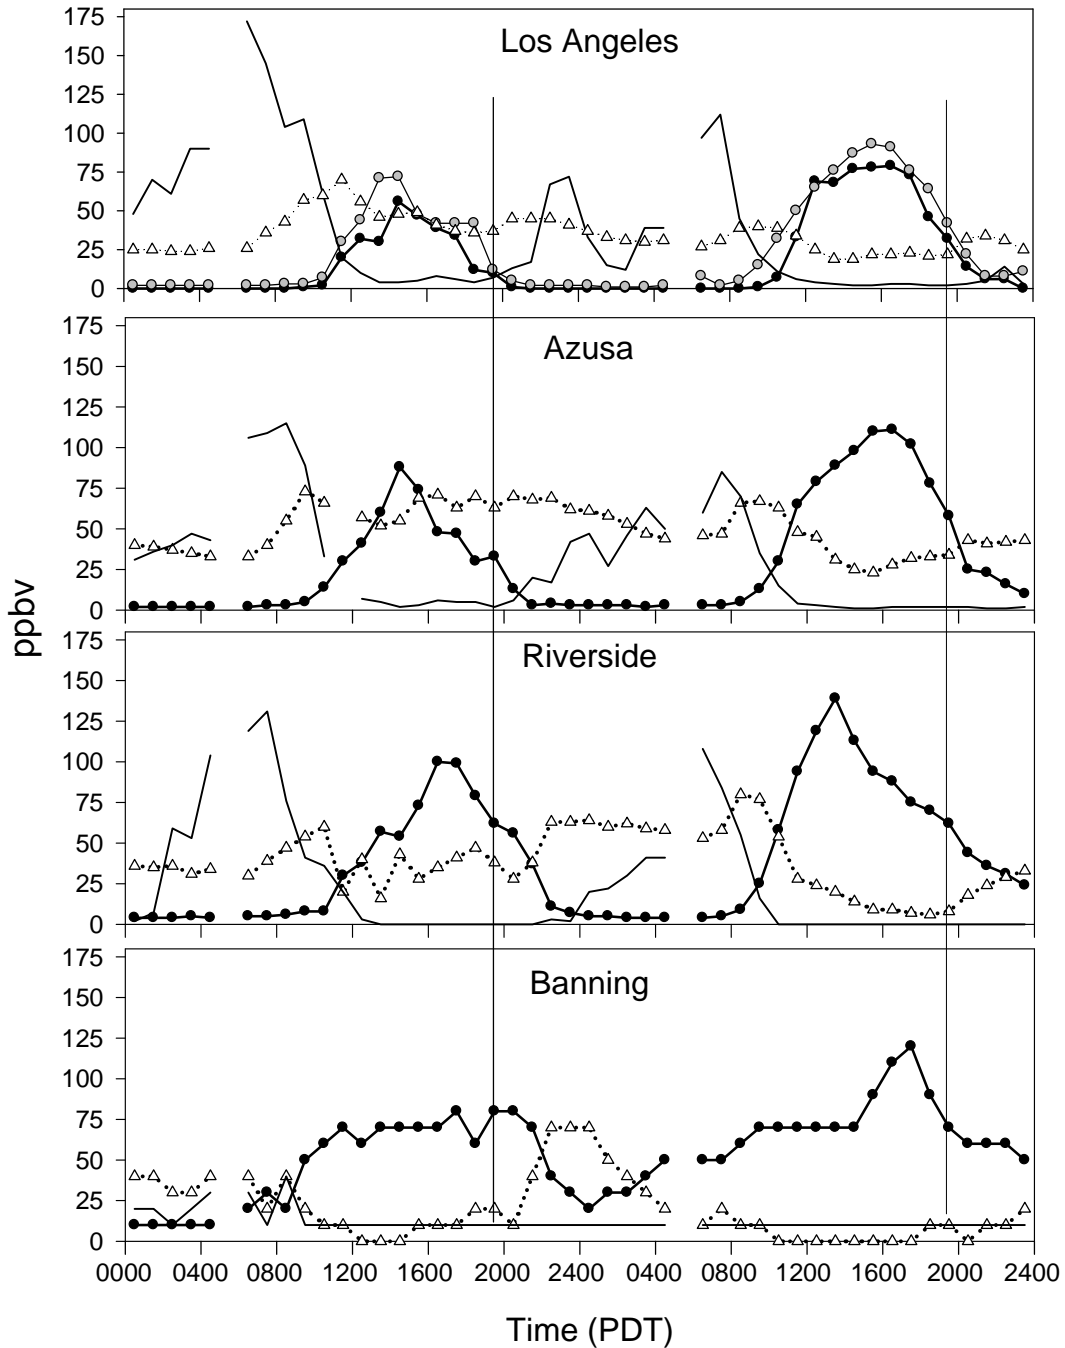

Figure S9. Hourly co-pollutant data collected during SCOS 1997 from August 22-23, 1997. ●, Hourly average O<sub>3</sub> measurements; △, hourly average NO<sub>2</sub> measurements; —, hourly average NO. NO and NO<sub>2</sub> data for the Los Angeles North Main sampling site were unavailable, so the data shown is from the nearby Pico Rivera (PR) site along with O<sub>3</sub> data from both the Los Angeles site (●) and the PR site (○). Solid vertical lines represent the approximate time of sunset during the sampling period (19:31). Sampling periods in Los Angeles and Azusa ran from 0600-1200, 1200-1800 and 1800-0600 hr while sampling periods in Riverside and Banning ran from 0600-1800 and 1800-0600 hr.

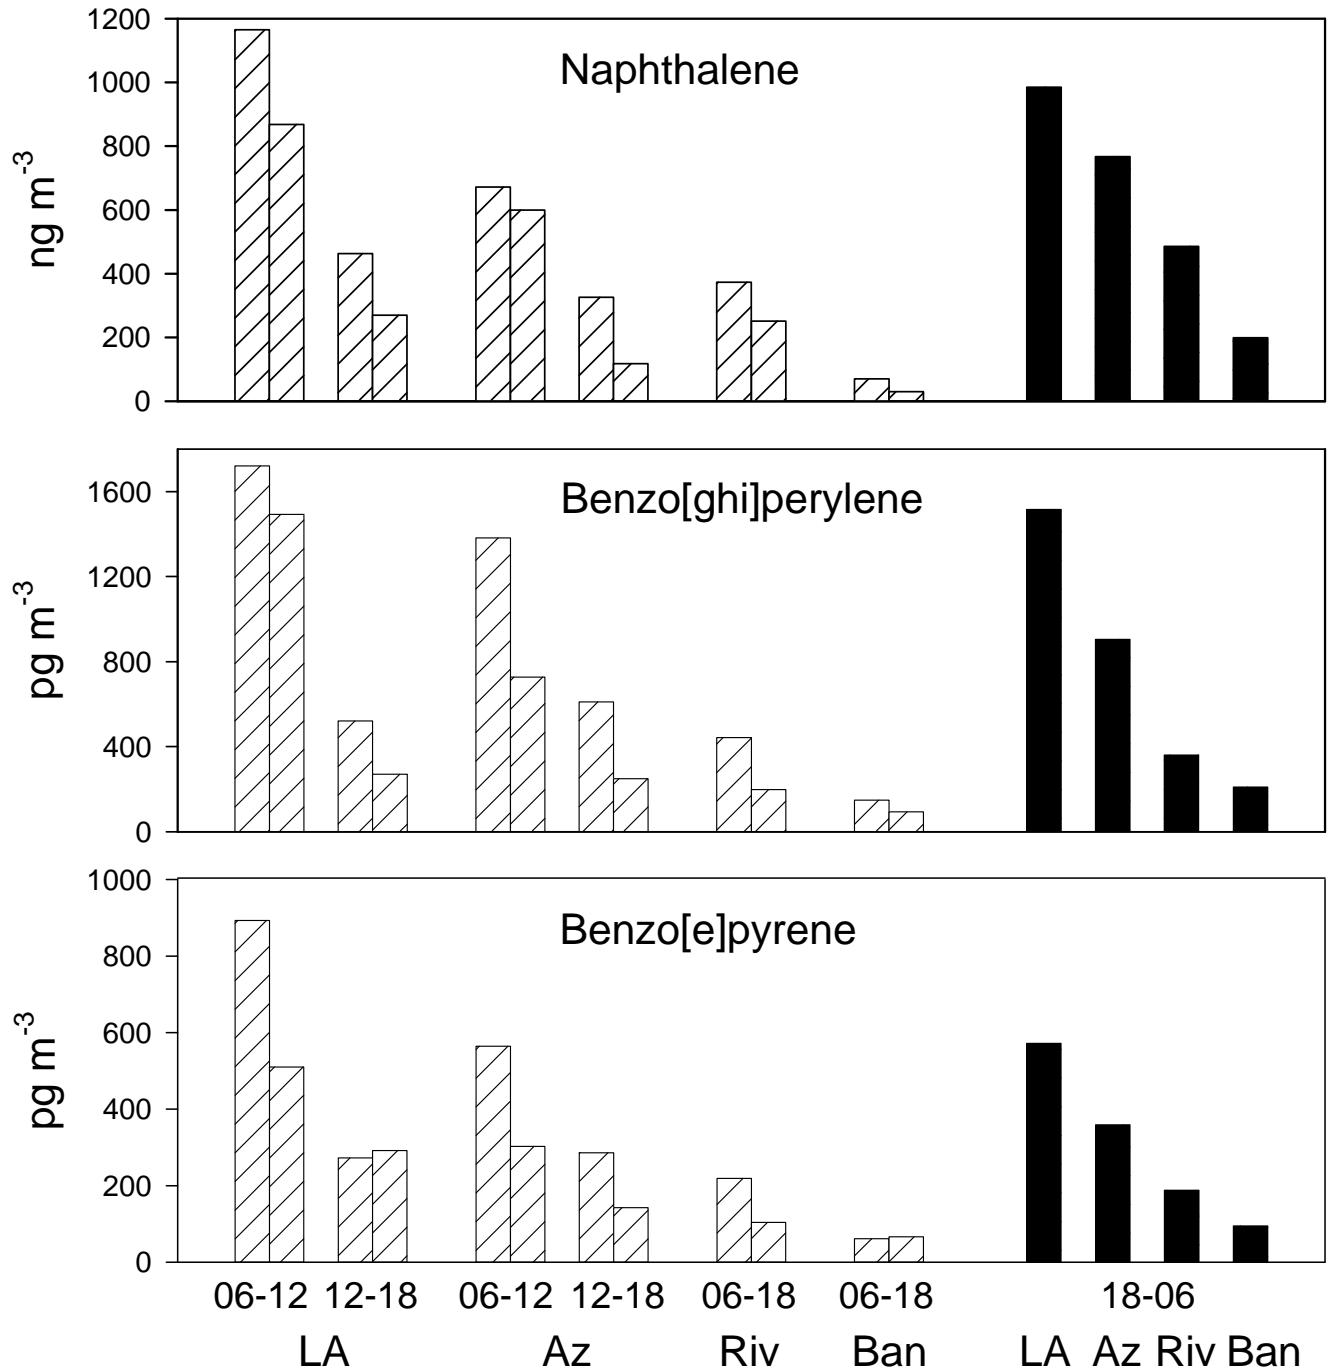

Figure S10. Ambient concentrations of naphthalene, benzo[ghi]perylene, and benzo[e]pyrene measured at sites during the SCOS97 campaign. The naphthalene concentrations are reported from gas-phase samples collected on Tenax-TA adsorbent (Atkinson et al., 2001); note the ng m<sup>-3</sup> scale for naphthalene. Patterned data bars, , represent daytime samples while filled data bars, , represent 12-hr nighttime samples; LA = Los Angeles; Az = Azusa; Riv = Riverside; Ban = Banning.

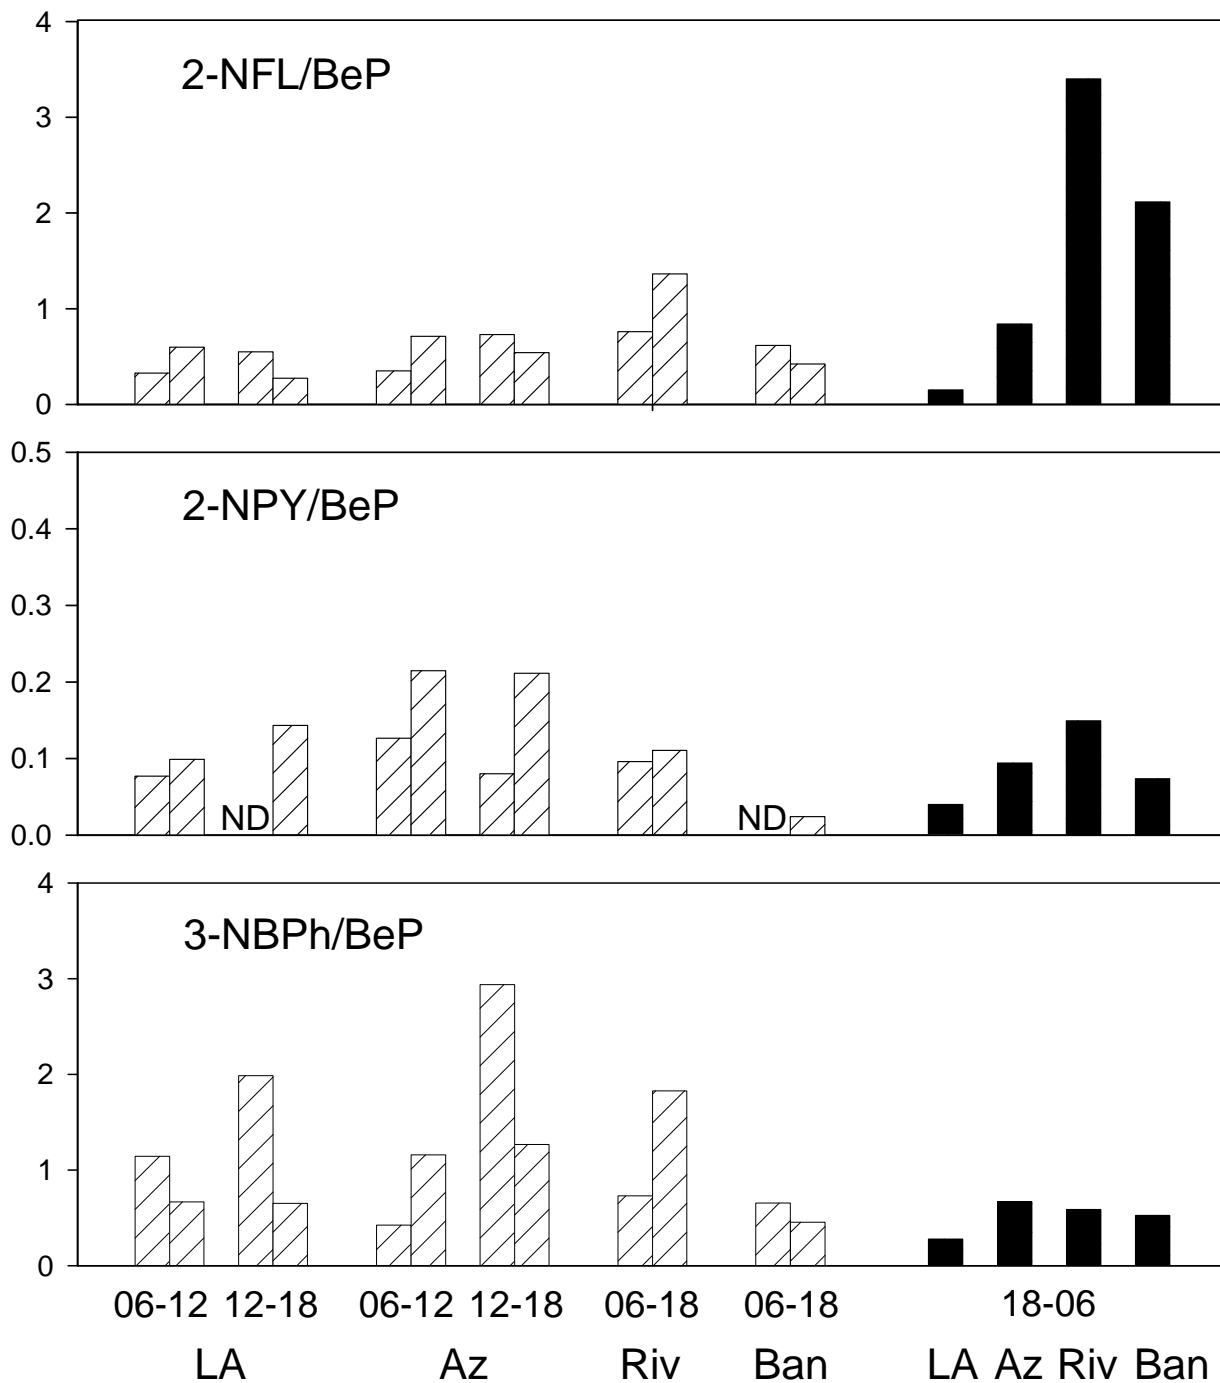

Figure S11. Ratios of 2-nitrofluoranthene/benzo[e]pyrene (2-NFL/BeP) (top), 2-nitropyrene/benzo[e]pyrene (2-NPY/BeP) (middle) and 3-nitrobiphenyl/benzo[e]pyrene (3-NBPh/BeP) (bottom) measured during the SCOS97 study. Patterned data bars, , represent daytime samples while filled data bars, , represent 12-hr nighttime samples; LA = Los Angeles; Az = Azusa; Riv = Riverside; Ban = Banning; ND = not determined.

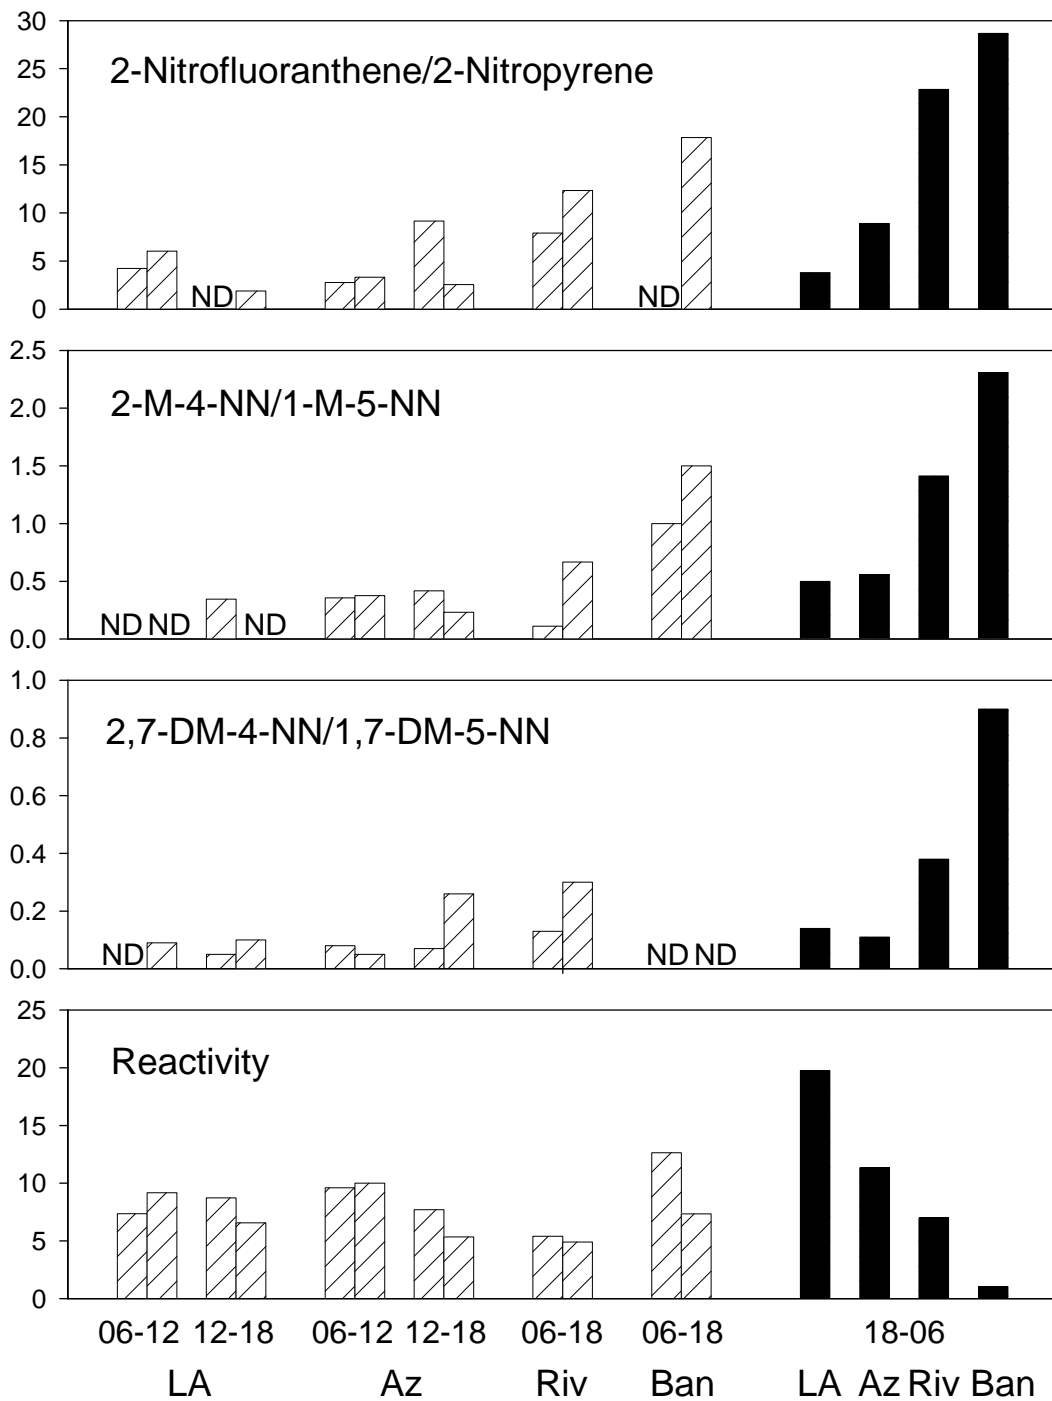

Figure S12. Ratios of 2-nitrofluoranthene/2-nitropyrene (top), 2-methyl-4-nitronaphthalene/1-methyl-5-nitronaphthalene [2-M-4-NN/1-M-5-NN] (second panel), 2,7-dimethyl-4-nitronaphthalene/1,7-dimethyl-5-nitronaphthalene [2,7-DM-4-NN/1,7-DM-5-NN] (third panel), and reactivity of ambient particles towards nitration (bottom) for the SCOS97 study. Patterned data bars, , represent daytime samples while filled data bars, , represent 12-hr nighttime samples; LA = Los Angeles; Az = Azusa; Riv = Riverside; Ban = Banning; ND = not determined.



Table S9. Ratios of 1-NPY/BeP calculated for ambient samples with and without exposure to N<sub>2</sub>O<sub>5</sub>/NO<sub>3</sub>/NO<sub>2</sub>

| Site <sup>b</sup>      | Time      | 1-NPY/BeP unexposed <sup>c</sup> | 1-NPY/BeP exposed <sup>d</sup> |
|------------------------|-----------|----------------------------------|--------------------------------|
| Beijing 1 <sup>e</sup> | 24-hr.    | 0.013                            | 0.33                           |
| Beijing 2 <sup>e</sup> | 24-hr.    | 0.015                            | 0.22                           |
| Beijing 3 <sup>e</sup> | 24-hr.    | 0.016                            | 0.60                           |
| LA97-1                 | 0600-1158 | 0.030                            | 0.082                          |
| LA97-2                 | 1202-1800 | 0.038                            | 0.16                           |
| LA97-3                 | 1803-0556 | 0.030                            | 0.18                           |
| LA97-4                 | 0602-1158 | 0.034                            | 0.14                           |
| LA97-5                 | 1202-1800 | 0.030                            | 0.12                           |
| A97-13                 | 0600-1200 | 0.033                            | 0.19                           |
| A97-15                 | 1203-1800 | 0.031                            | 0.16                           |
| A97-16                 | 1800-0600 | 0.024                            | 0.092                          |
| A97-18                 | 0603-1200 | 0.040                            | 0.13                           |
| A97-20                 | 1204-1800 | 0.045                            | 0.13                           |
| R97-13                 | 0600-1802 | 0.031                            | .089                           |
| R97-14                 | 1811-0600 | 0.051                            | 0.19                           |
| R97-15                 | 0614-1750 | 0.035                            | 0.092                          |
| B97-14                 | 0605-1800 | 0.050                            | 0.290                          |
| B97-15                 | 1814-0600 | 0.082                            | 0.093                          |

| Site <sup>b</sup>   | Time      | 1-NPY/BeP<br>unexposed <sup>c</sup> | 1-NPY/BeP<br>exposed <sup>d</sup> |
|---------------------|-----------|-------------------------------------|-----------------------------------|
| B97-17              | 0607-1800 | 0.020                               | 0.19                              |
| R2012 N1            | 1800-0600 | 0.051                               | 0.84                              |
| R2012 D1            | 0600-1800 | 0.124                               | 0.40                              |
| R2012 N2            | 1800-0600 | 0.079                               | 0.20                              |
| R2012 D2            | 0600-1800 | 0.112                               | 0.17                              |
| R2012 N3            | 1800-0600 | 0.074                               | 0.14                              |
| R2012 D3            | 0600-1800 | 0.070                               | 0.17                              |
| R2012 N4            | 1800-0600 | 0.050                               | 0.27                              |
| R2012 D4            | 0600-1800 | 0.061                               | 0.12                              |
| R97 MS <sup>f</sup> | 0555-1740 | 0.066                               | 0.065                             |

<sup>a</sup> Abbreviations: 1-NPY = 1-nitropyrene; BeP = benzo[e]pyrene.

<sup>b</sup> Sampling information is described in Table S1.

<sup>c</sup> Initial ratios of 1-NPY/BeP observed from ambient particulate matter .

<sup>d</sup> Ratios of 1-NPY/BeP after filters samples were exposed to 8 additions of N<sub>2</sub>O<sub>5</sub> and NO<sub>2</sub>. Additions were performed once per hour.

<sup>e</sup> Reported Beijing ratios are each the mean value of 3 replicate measurements.

<sup>f</sup> Reported R97 MS ratios are each the mean value of 9 replicate measurements.

## Mechanistic Implications

*Gas-phase versus Heterogeneous Formation of Nitro-PAHs.* The atmospheric gas-phase  $\text{NO}_3$  radical-initiated reactions of PAHs are postulated to proceed by initial addition of  $\text{NO}_3$  radicals to the position of highest electron density, followed by *ortho* or *para* addition of  $\text{NO}_2$ , and subsequent loss of  $\text{HNO}_3$  (Arey, 1988; Atkinson and Arey, 2007; Wang et al., 2010). Theoretical studies have shown this mechanism to be the most energetically favorable for naphthalene when compared with direct attack by  $\text{N}_2\text{O}_5$  or  $\text{NO}_2$  because of high free energy barriers for the latter reactions ( $36 \text{ kcal mol}^{-1}$  and  $25\text{-}28 \text{ kcal mol}^{-1}$  for  $\text{N}_2\text{O}_5$  and  $\text{NO}_2$ , respectively) (Ghigo et al., 2006). Thus, in the case of the gas-phase reaction of FL with  $\text{NO}_3$  radicals, the initial addition of  $\text{NO}_3$  is expected to proceed at the most electron-dense 3-carbon position (Arey, 1998), followed by *ortho* addition of  $\text{NO}_2$  at the 2-carbon position, with the loss of  $\text{HNO}_3$  resulting in 2-NFL. This mechanism could also apply to the gas-phase  $\text{PY} + \text{OH}$  reaction, in which OH adds initially to the electron dense 1-carbon (Ruehle et al., 1985) followed by addition of  $\text{NO}_2$  at the 2-carbon position and loss of  $\text{H}_2\text{O}$  to form 2-NPY (this has also been observed to occur in the  $\text{PY} + \text{NO}_3$  reaction at very high  $\text{NO}_2$  concentrations (Atkinson et al., 1990)). It should be noted that a significant energy barrier exists to the elimination of  $\text{H}_2\text{O}$  during these reactions (Ghigo et al., 2006), and so it is possible that nitro-PAH formation occurs through decomposition of the chemically-activated intermediate.

If a similar step-wise mechanism is suggested to occur for the heterogeneous reaction of FL or PY with  $\text{NO}_3$  and  $\text{NO}_2$  to form nitrofluoranthenes and nitropyrenes (Gross and Bertram 2008; Kwamena and Abbatt, 2008; Zhang et al., 2011), then the expected isomers would be 2-NFL or 4-NPY. In contrast, previous studies of heterogeneous nitration of PY and FL via  $\text{N}_2\text{O}_5/\text{NO}_3/\text{NO}_2$  formed 1-NPY as the dominant isomer, followed by 3-NFL, 8-NFL, 7-NFL, and 1-NFL in differing relative amounts (Zimmermann et al., 2012; Pitts et al., 1985a). Thus, isomer

distributions of NFLs and NPYs appear to provide a qualitative way of assessing gas-phase *versus* heterogeneous formation of nitro-PAHs in chamber or flow-tube systems.

Recent measurements of low uptake coefficients for  $N_2O_5$  onto PAH surfaces relative to that of  $NO_3$  radicals (Gross and Bertram, 2008) suggest that  $N_2O_5$  is not the agent of nitration for heterogeneous reactions of PAHs. Although Mak et al. (2007) coupled the measurement of these uptake coefficients to the formation of oxygen- and nitrogen-containing functional groups by Fourier transform infrared spectroscopy (FTIR) and Kwamena and Abbatt (2008) identified nitro-PAHs as products from these reactions, no studies, to the authors knowledge, have investigated the unique isomer distribution of NFL or NPY products in combination with uptake coefficient measurements. Such studies would be very helpful in further elucidating the mechanism of PAH nitration via the heterogeneous reaction with  $N_2O_5/NO_3/NO_2$ .

Furthermore, the relatively low reactivity toward nitration of all the ambient PM samples collected during the daytime, including samples with high PAH concentrations, suggest that ambient particulate PAHs are rapidly deactivated (or become unavailable) toward nitration in the atmosphere. The two Los Angeles morning samples (0600-1200) and the nighttime sample (1800-0600) had high and similar B(ghi)P and BeP concentrations and the particle-associated PY concentrations were comparable, with the morning samples having somewhat higher PY than the nighttime sample (Table S3). However, three-fold greater formation of 1-NPY resulted from exposing the nighttime sample in comparison with the morning samples (Table S7). The resulting higher calculated reactivity toward nitration for the nighttime sample suggests that daytime OH radical chemistry (perhaps by a mechanism of secondary VOC products depositing on the particles) rapidly decreased the particle-associated PAH reactivity toward nitration. This again illustrates the potential difficulties in extrapolating from laboratory results to ambient atmospheres.

## References

- Arey, J. Atmospheric Reactions of PAHs Including the Formation of Nitroarenes. Chapter 9 in: *The Handbook of Environmental Chemistry Vol.3 Part I, PAHs and Related Compounds*, Neilson A. H. (Ed.), Springer-Berlag, Berlin, **1998**, pp. 347-385.
- Atkinson, R.; Arey, J. Mechanisms of the gas-phase reactions of aromatic hydrocarbons and PAHs with OH and NO<sub>3</sub> radicals. *Polycyclic Aromatic Compounds* **2007**, *27*, 15-40.
- Atkinson, R.; Tuazon, E. C.; Mac Leod, H.; Aschmann, S. M.; Winer, A. M. The gas-phase reaction of chlorine nitrate with water vapor. *Geophys. Res. Lett.* **1986**, *13*, 117-120.
- Atkinson, R.; Arey, J.; Zielinska, B.; Aschmann, S. M. Kinetics and nitro-products of the gas-phase OH and NO<sub>3</sub> radical-initiated reactions of naphthalene-d<sub>8</sub>, fluoranthene-d<sub>10</sub>, and pyrene. *Int. J. Chem. Kin.* **1990**, *22*, 999-1014.
- Atkinson, R.; Arey, J.; Dodge, M. C.; Harger, W. P.; McElroy, P.; Phouongphouang, P. T. *Yields and Reactions of Intermediate Compounds Formed from the Initial Atmospheric Reactions of Selected VOCs*; Contract No. 96-306; Final Report to the California Air Resources Board; **2001**. May be accessed from (<http://www.arb.ca.gov>). Last accessed April, 2013.
- California Air Resources Board (<http://www.arb.ca.gov>), Historical Air Quality Archives and Latest Ozone, Air Quality Data, Air Quality Data- Today. Last accessed Sept. 3, 2012.
- Ghigo, G.; Causa, M.; Maranzana, A.; Tonachini, G.; Aromatic hydrocarbon nitration under tropospheric and combustion conditions: a theoretical mechanistic study. *J. Phys. Chem. A* **2006**, *110*, 13270-13282.
- Gross, S.; Bertram, A. K. Reactive uptake of NO<sub>3</sub>, N<sub>2</sub>O<sub>5</sub>, NO<sub>2</sub>, HNO<sub>3</sub>, and O<sub>3</sub> on three types of polycyclic aromatic hydrocarbon surfaces. *J. Phys. Chem. A* **2008**, *112*, 3104-3113.
- Heintz, F.; Platt, U.; Flentje, H.; Dubois, R. Long-term observation of nitrate radicals at the Tor Station, Kap Arkona (Rugen). *J. Geophys. Res.* **1996**, *101*, 22891-22910.
- IUPAC, **2013**. *Evaluated Kinetic Data for Atmospheric Chemistry*. IUPAC Subcommittee for Gas Kinetic Data Evaluation, <http://www.iupac-kinetic.ch.cam.ac.uk>.
- Kwamena, N. O. A.; Abbatt, J. P. D. Heterogeneous nitration reactions of polycyclic aromatic hydrocarbons and *n*-hexane soot by exposure to NO<sub>3</sub>/NO<sub>2</sub>/N<sub>2</sub>O<sub>5</sub>. *Atmos. Environ.* **2008**, *42*, 8309-8314.
- Mak, J.; Gross, S.; Bertram, A. K. Uptake of NO<sub>3</sub> on soot and pyrene surfaces. *Geophys. Res. Lett.* **2007**, *34*, L10804.
- Marley, N. A.; Gaffney, J. S.; Ramos-Villegas, R.; Cardenas Gonzalez, B. Comparison of measurements of peroxyacyl nitrates and primary carbonaceous aerosol concentrations in Mexico City determined in 1997 and 2003. *Atmos. Chem. Phys.* **2007**, *7*, 2277-2285.

- Marr, L. C.; Kirchstetter, T. W.; Harley, R. A.; Miguel, A. H.; Hering, S. V.; Hammond, S. K. Characterization of polycyclic aromatic hydrocarbons in motor vehicle fuels and exhaust emissions, *Environ. Sci. Technol.* **1999**, *33*, 3091-3099.
- Marr, L. C.; Dzepina, K.; Jimenez, J. L.; Reisen, F.; Bethel, H. L.; Arey, J.; Gaffney, J. S.; Marley, N. A.; Molina, L. T.; Molina M. J. Sources and transformations of particle-bound polycyclic aromatic hydrocarbons in Mexico City. *Atmos. Chem. Phys.* **2006**, *6*, 1733-1745.
- Parrish, D. D.; Singh, H. B.; Molina, L.; Madronich, S. Air quality progress in North American megacities: a review. *Atmos. Environ.* **2011**, *45*, 7015-7025.
- Pitts, J. N., Jr.; Sweetman, J. A.; Zielinska, B.; Winer, A. M.; Atkinson, R. Determination of 2-nitrofluoranthene and 2-nitropyrene in ambient particulate organic matter: evidence for atmospheric reactions. *Atmos. Environ.* **1985a**, *19*, 1601-1608.
- Pitts, J. N., Jr.; Sweetman, J. A.; Zielinska, B.; Atkinson, R.; Winer, A. M.; Harger, W. P. Formation of nitroarenes from the reaction of polycyclic aromatic hydrocarbons with dinitrogen pentoxide. *Environ. Sci. Technol.* **1985b**, *19*, 1115-1121.
- Ramdahl, T.; Arey, J.; Zielinska, B.; Atkinson, R.; Winer, A. M. Analysis of dinitrofluoranthenes by high resolution capillary gas chromatography/mass spectrometry. *J. High Res. Chromatog.* **1986**, *9*, 515-517.
- Ramdahl, T.; Zielinska, B.; Arey, J.; Kondrat, R. W. The electron impact mass spectra of di- and trinitrofluoranthenes. *Biomed. Environ. Mass.* **1988**, *17*, 55-62.
- Reissell A.; Arey, J. Biogenic volatile organic compounds at Azusa and elevated sites during the 1997 Southern California Ozone Study. *J. Geophys. Res.* **2001**, *106*, 1607-1621.
- Ringuet, J.; Albinet, A.; Leoz-Garziandia, E.; Budzinski, H.; Villenave, E. Reactivity of polycyclic aromatic compounds (PAHs, NPAHs, and OPAHs) adsorbed on natural aerosol particles exposed to atmospheric oxidants. *Atmos. Environ.* **2012**, *61*, 15-22.
- Ruehle, P. H.; Bosch, L. C.; Duncan, W. P. Synthesis of Nitrated Polycyclic Aromatic Hydrocarbons. Chapter 4 in *Nitrated Polycyclic Aromatic Hydrocarbons*, White, C. M. (Ed.), Huethig, Heidelberg, **1985**, pp. 169-235.
- Squadrito, G. L.; Church, D. F.; Pryor, W. A. Anomalous nitration of fluoranthene with nitrogen dioxide in carbon tetrachloride. *J. Am. Chem. Soc.* **1987**, *109*, 6535-6537.
- Squadrito, G. L.; Fronczek, F. R.; Church, D. F.; Pryor, W. A. A dichotomy in the nitration of fluoranthene with NO<sub>2</sub>/N<sub>2</sub>O<sub>4</sub>: mechanistic and toxicological implications. *J. Org. Chem.* **1990**, *55*, 2616-2621.
- Stutz, J.; Alicke, B.; Ackermann, R.; Geyer, A.; White, A.; Williams, E. Vertical profiles of NO<sub>3</sub>, N<sub>2</sub>O<sub>5</sub>, O<sub>3</sub>, and NO<sub>x</sub> in the nocturnal boundary layer: 1. Observations during the Texas Air Quality Study 2000. *J. Geophys. Res.* **2004**, *109*, D12306.

Tuazon, E. C.; Atkinson, R.; Plum, C. N.; Winer, A. M.; Pitts, J. N., Jr. The reaction of gas-phase  $\text{N}_2\text{O}_5$  with water vapor. *Geophys. Res. Lett.* **1983**, *10*, 953-965.

Wang, L.; Atkinson, R.; Arey, J. Comparison of alkylnitronaphthalenes formed in  $\text{NO}_3$  and OH radical-initiated chamber reactions with those observed in ambient air. *Environ. Sci. Technol.* **2010**, *44*, 2981-2987.

Wang, W.; Primbs, T.; Tao, S.; Massey Simonich, S. L. Atmospheric particulate matter pollution during the 2008 Beijing Olympics. *Environ. Sci. Technol.* **2009**, *43*, 5314-5320.

Wang, W.; Jariyasopit, N.; Schrlau, J.; Jia, Y.; Tao, S.; Yu, T. W.; Dashwood, R. H.; Zhang, W.; Wang, X.; Massey Simonich, S. L. Concentration and photochemistry of PAHs, NPAHs, and OPAHs and toxicity of  $\text{PM}_{2.5}$  during the Beijing Olympic games. *Environ. Sci. Technol.* **2011**, *45*, 6887-6895.

Zhang, Y.; Yang, B.; Gan, J.; Liu, C.; Shu, X.; Shu, J. Nitration of particle-associated PAHs and their derivatives (nitro-, oxy-, and hydroxy-PAHs) and  $\text{NO}_3$  radicals. *Atmos. Environ.* **2011**, *45*, 2515-2521.

Zielinska, B.; Arey, J.; Atkinson, R.; Ramdahl, T.; Winer, A. M.; Pitts, J. N. Jr. Reaction of dinitrogen pentoxide with fluoranthene. *J. Am. Chem. Soc.* **1986**, *108*, 4126-4132.

Zimmermann, K.; Atkinson, R.; Arey, J.; Kojima, Y.; Inazu, K. Isomer distributions of molecular weight 247 and 273 nitro-PAHs in ambient samples, NIST diesel SRM, and from radical-initiated chamber reactions. *Atmos. Environ.* **2012**, *55*, 431-439.
